# Supplementary material for: Design and Molecular dynamic Investigations of 7,8-Dihydroxyflavone Derivatives as Potential Neuroprotective Agents Against Alpha-synuclein
Source: PubMed Central journal article supplement (PMC6969171; doi:10.1038/s41598-020-57417-9), 2020-01-17
Supplement: 41598_2020_57417_MOESM1_ESM.pdf [file 41598_2020_57417_MOESM1_ESM.pdf]

## SUPPLEMENTARY INFORMATION

### **Design and Molecular dynamic Investigations of 7,8-Dihydroxyflavone Derivatives as Potential Neuroprotective Agents Against Alpha-synuclein**

Mohankumar Thangavel<sup>a</sup>, Vivek Chandramohan<sup>b</sup>, Lalithamba Haralur Shankaraiah<sup>c</sup>, Richard L Jayaraj<sup>d</sup>, Kumaradhas Poomani<sup>e</sup>, Sivanandam Magudeeswaran<sup>e</sup>, Hunday Govindasamy<sup>e</sup>, Rajendran Vijayakumar<sup>f</sup>, Balakrishnan Rangasamy<sup>a</sup>, Manimaran Dharmar<sup>a</sup>, Elangovan Namasivayam<sup>a,\*</sup>

<sup>a</sup>Department of Biotechnology, School of Biosciences, Periyar University, Salem, Tamilnadu, India.

<sup>b</sup>Department of Biotechnology, Siddaganga Institute of Technology, Tumkur, Karnataka, India.

<sup>c</sup>Department of Chemistry, Siddaganga Institute of Technology, Tumkur, Karnataka, India.

<sup>d</sup>Department of Pharmacology and Therapeutics, College of Medicine and Health Sciences, Al-Ain, Abudhabi, 17666, United Arab Emirates.

<sup>e</sup>Department of Physics, School of Physical Sciences, Periyar University, Salem, Tamilnadu India.

<sup>f</sup>Department of Biology, College of Science in Zulfi, Majmaah University, Majmaah, 11952, Saudi Arabia.

Corresponding author E-mail: [elangovannn@gmail.com](mailto:elangovannn@gmail.com)

#### **This PDF file includes:**

Supplementary text

Supplementary Figure 1-7

Supplementary Table 1-3

## List of Supplementary figures

**8q (-16.3120)**

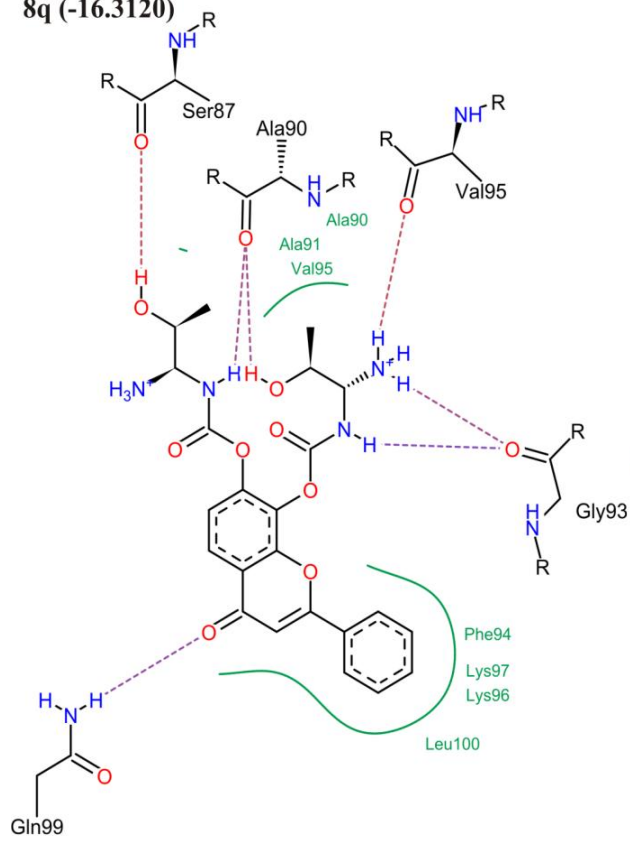

**8s (-16.1875)**

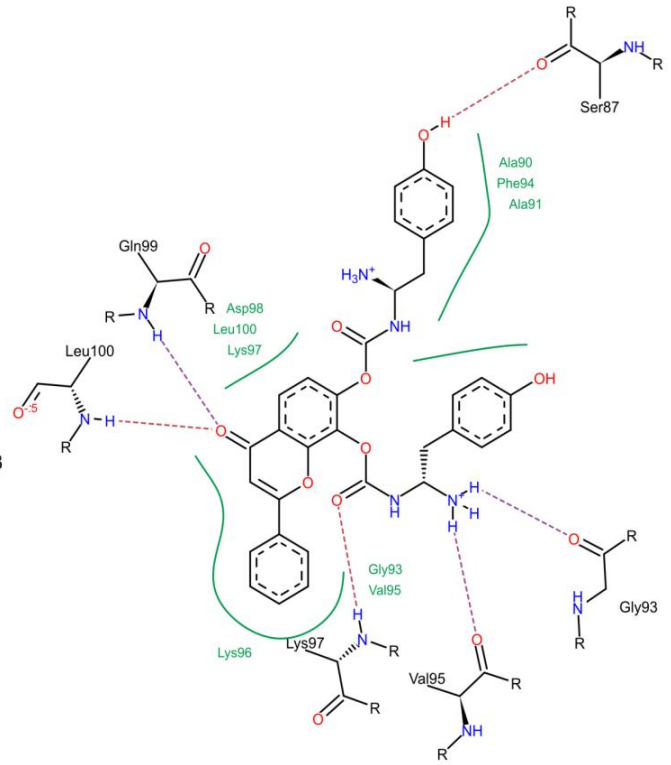

**8p (-15.2223)**

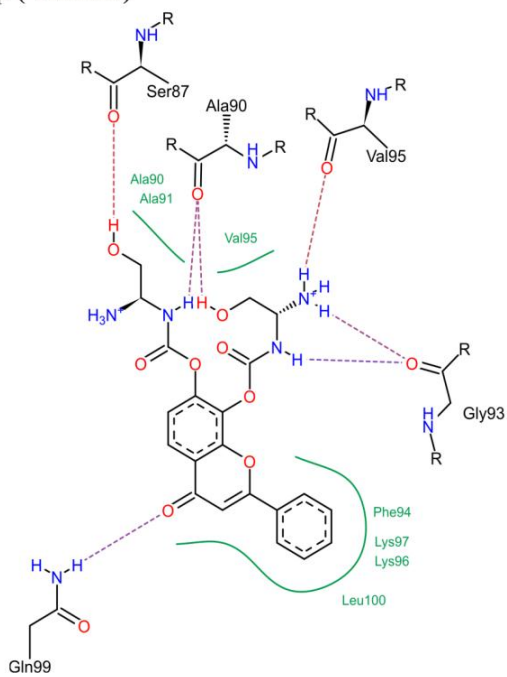

**8c (-14.3118)**

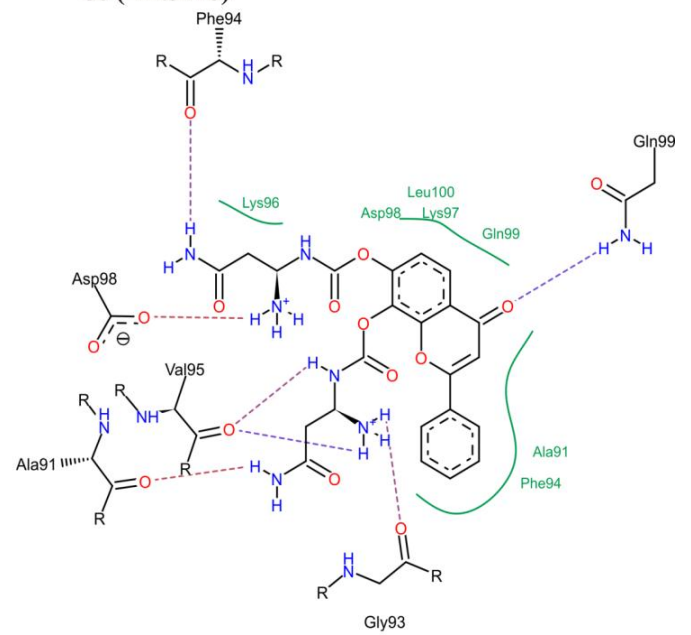

**8n (-14.2893)**

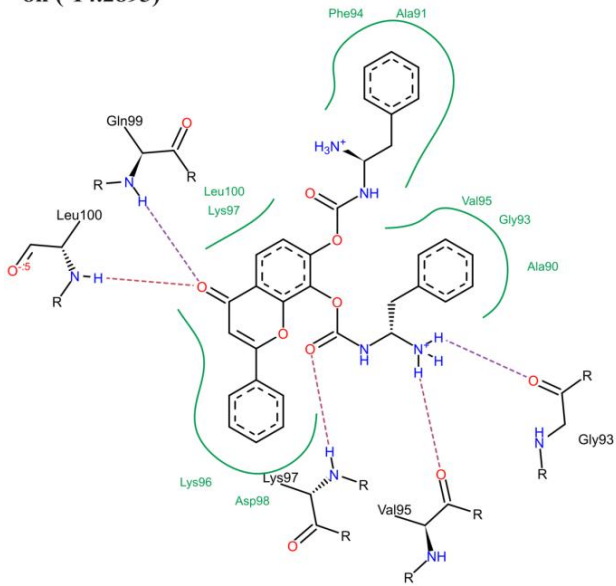

**8h (-14.2810)**

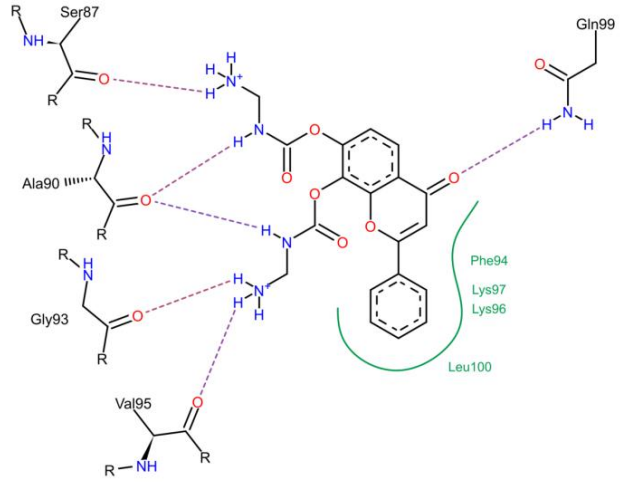

**8i (-13.9648)**

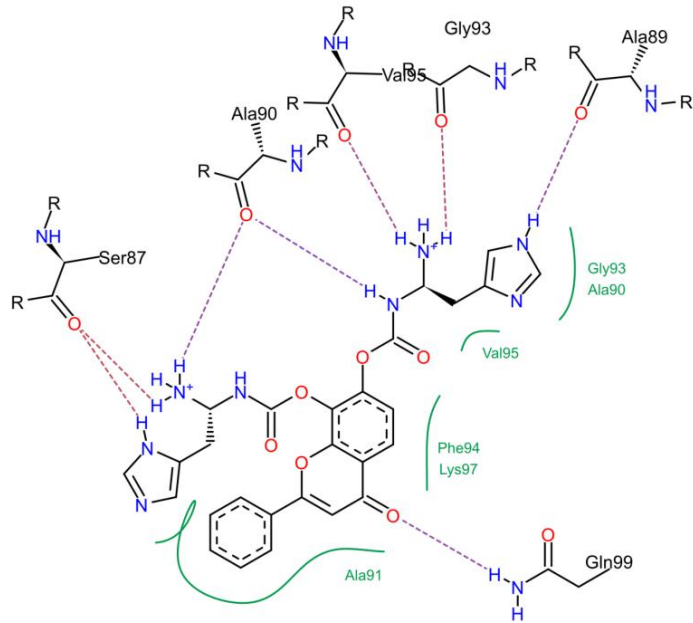

**8o (-13.5546)**

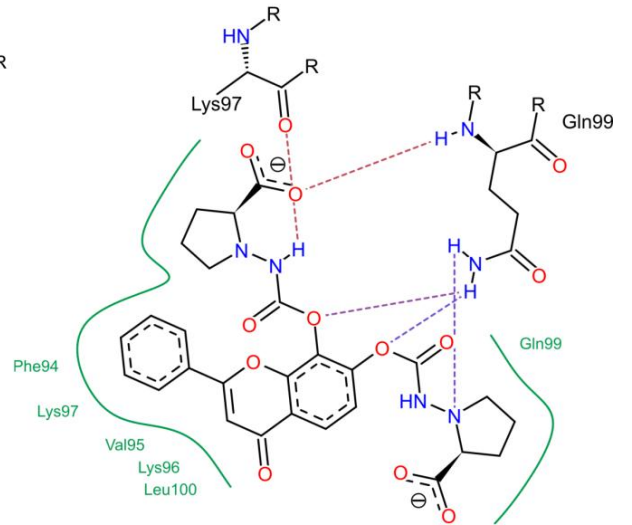

**8r (-13.0428)**

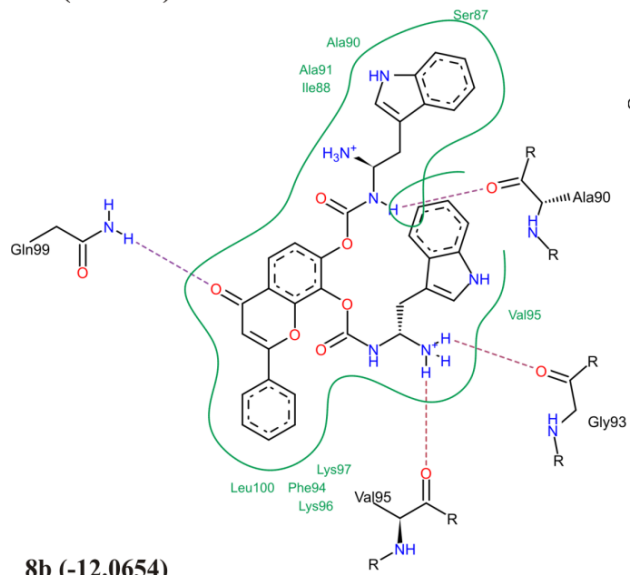

**8d (-12.4647)**

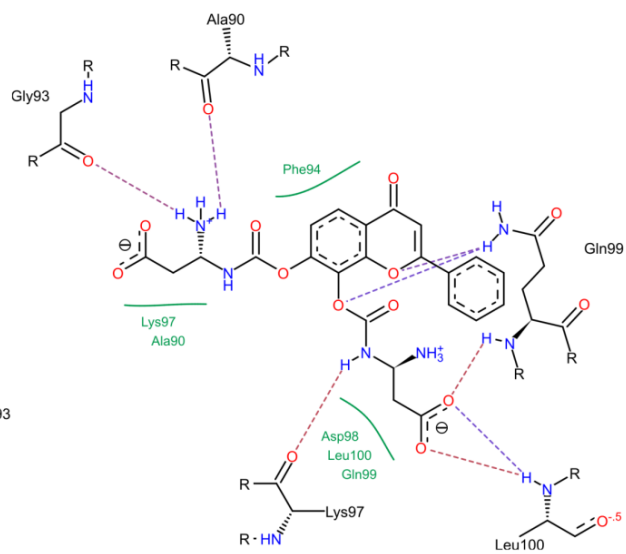

**8b (-12.0654)**

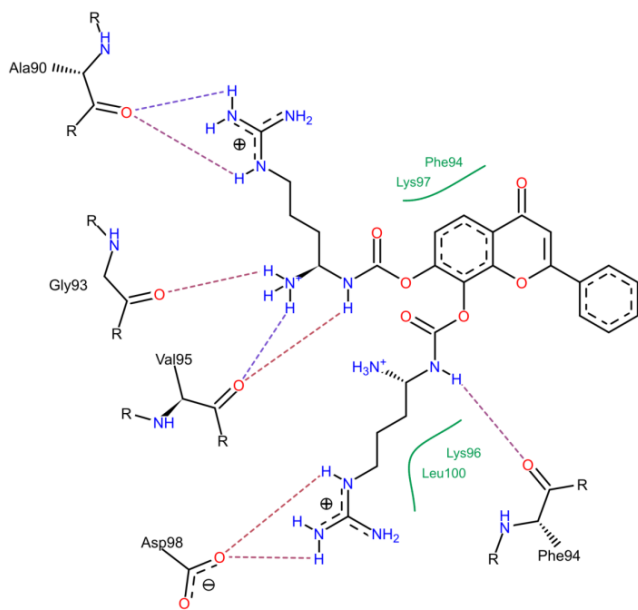

**4b (-11.8605)**

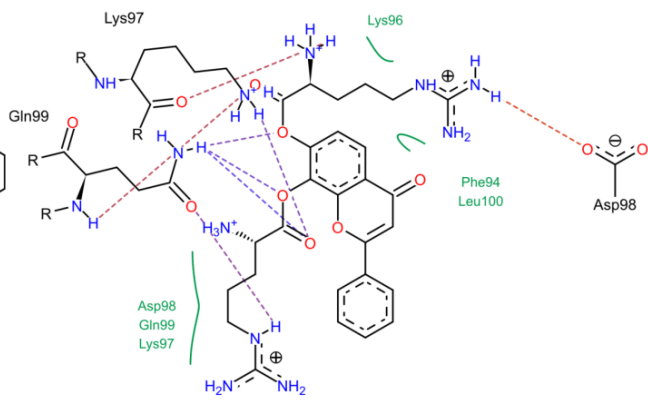

8a (-11.6654)

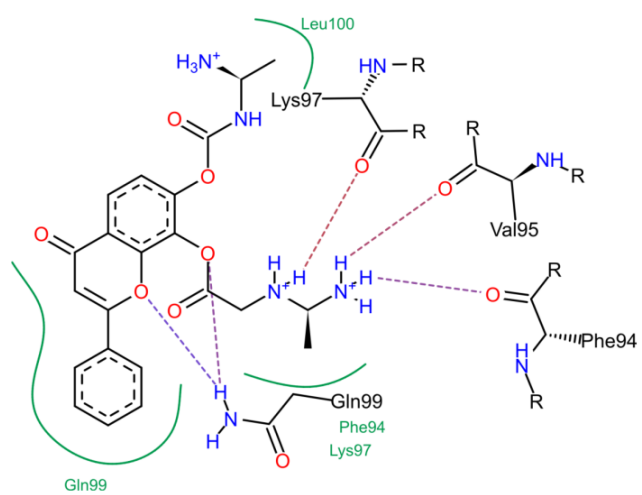

8f (-11.4819)

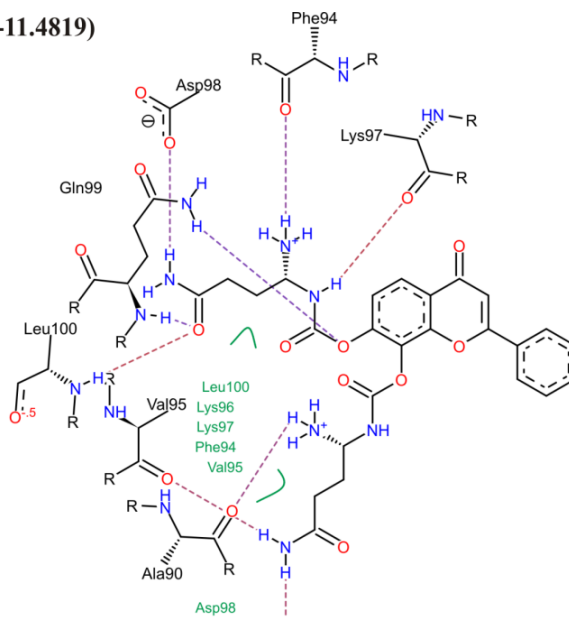

8g (-11.0592)

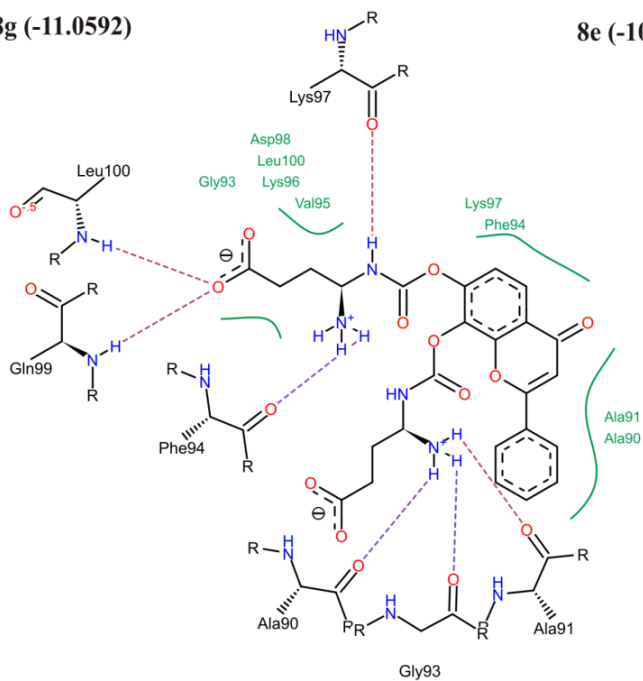

8e (-10.8509)

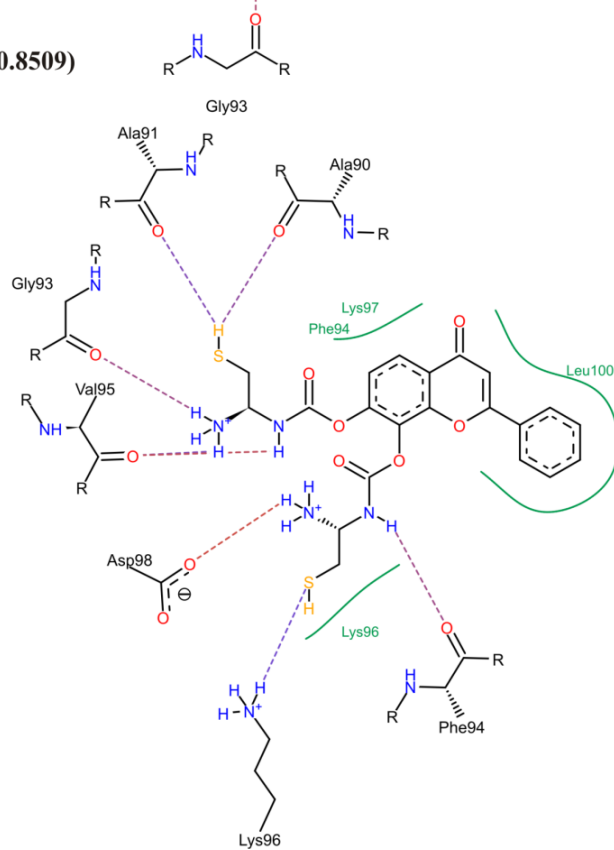

4o (-10.5688)

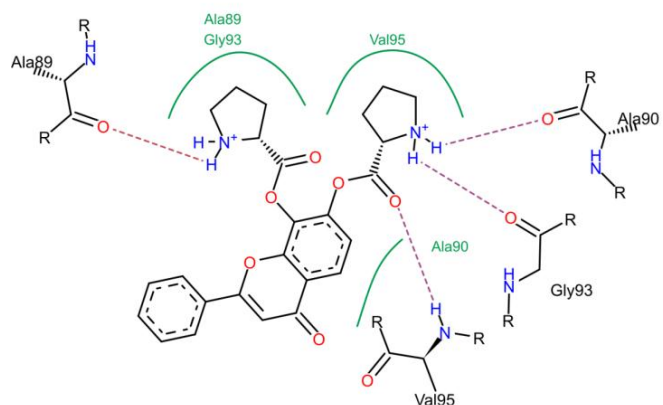

8j (-10.3430)

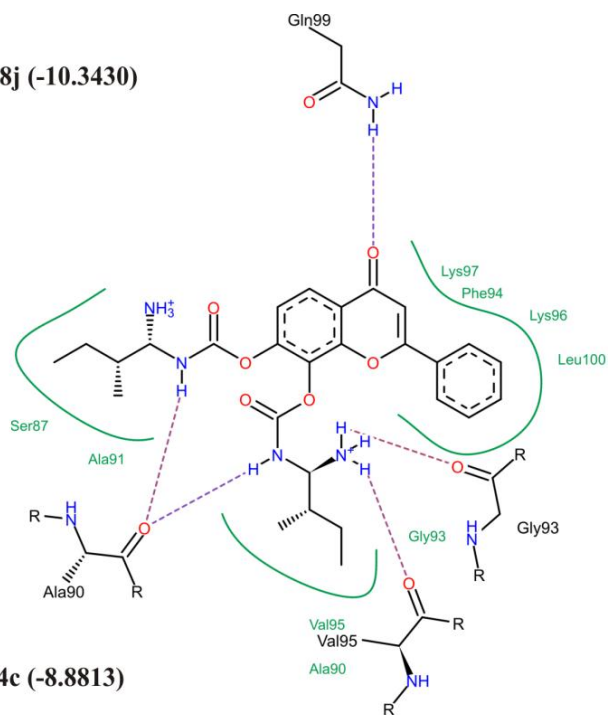

4p (-10.0120)

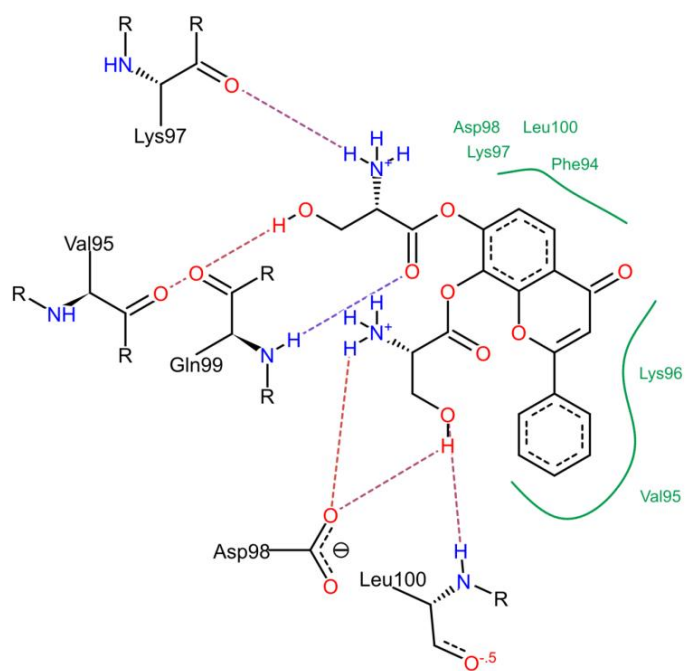

4c (-8.8813)

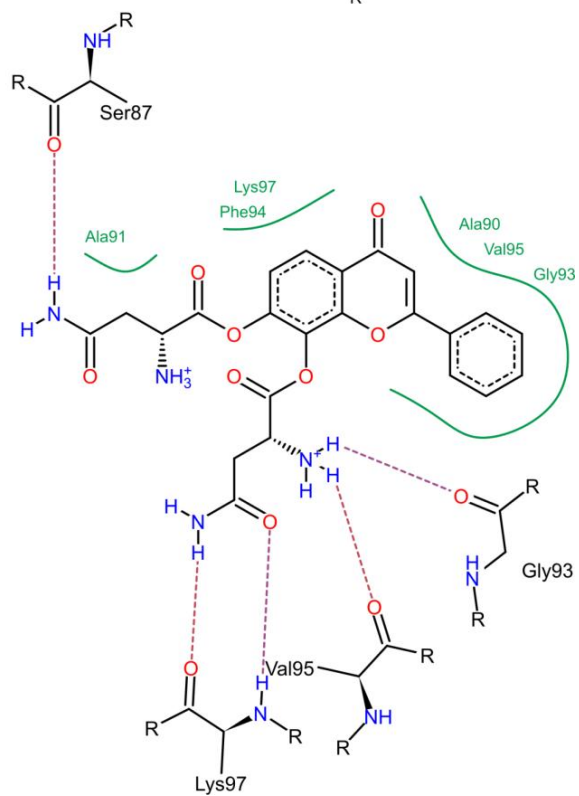

8t (-8.7657)

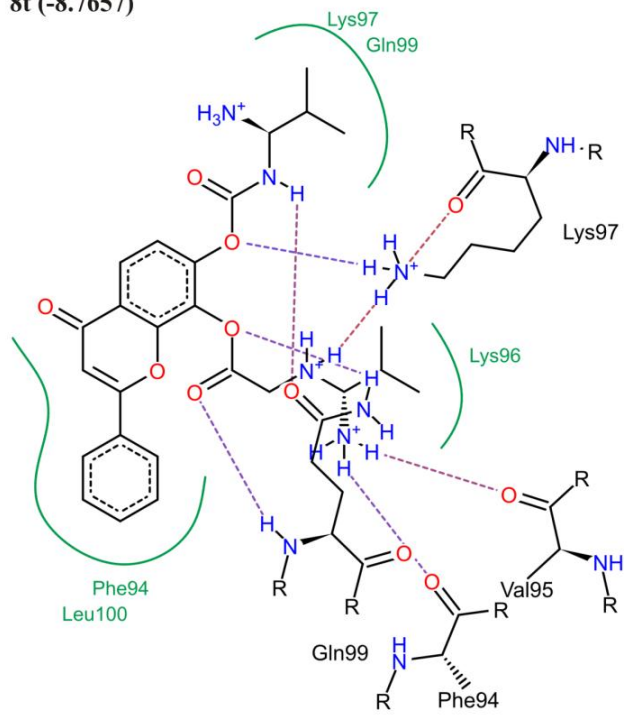

8k (-7.6249)

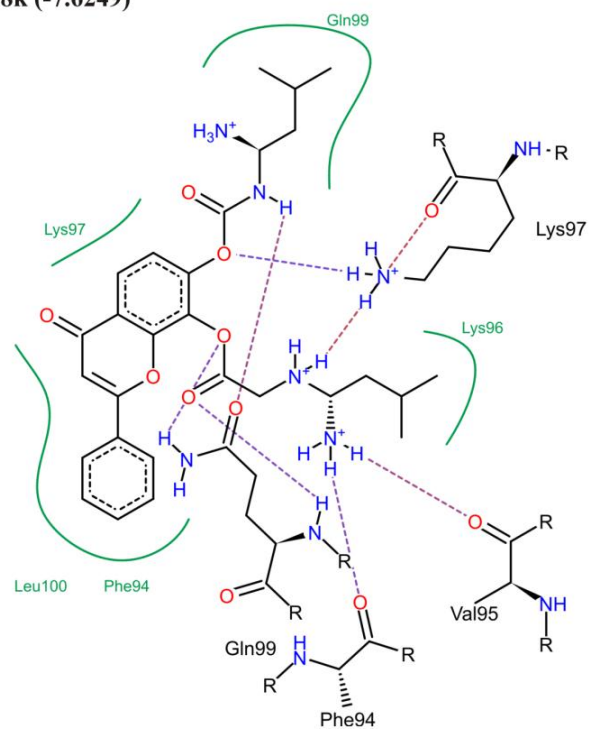

4r (-7.5145)

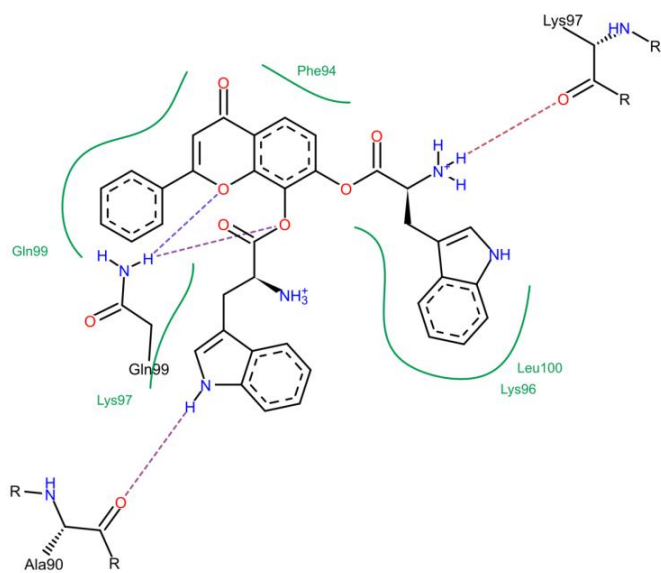

4i (-7.0715)

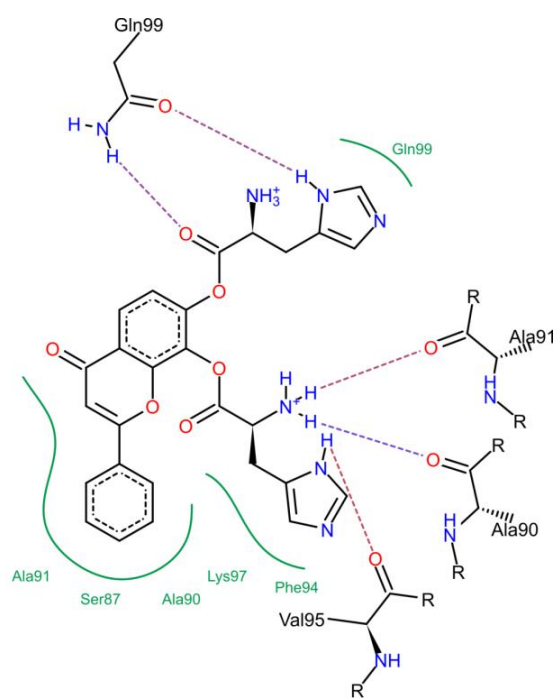

8l (-6.4282)

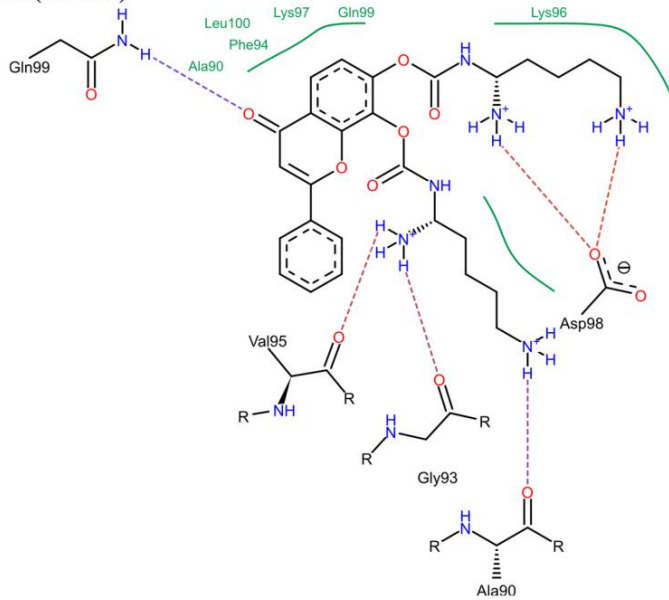

4a (-5.2385)

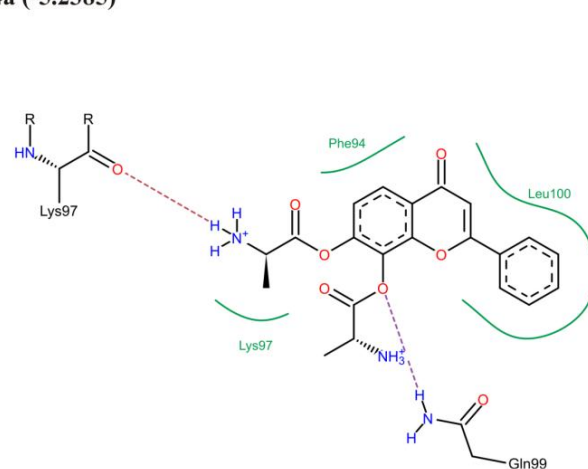

8m (-4.8384)

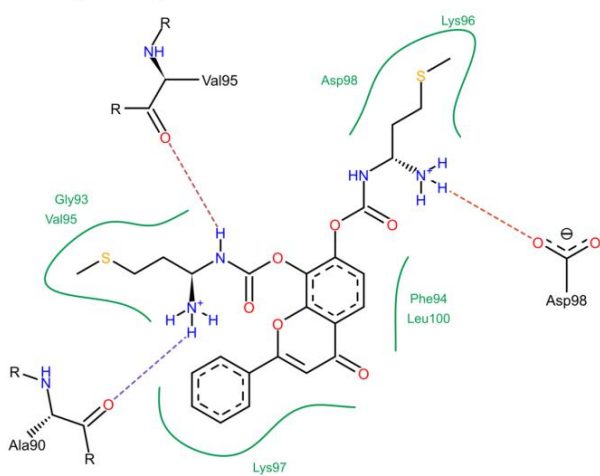

4f (-4.0678)

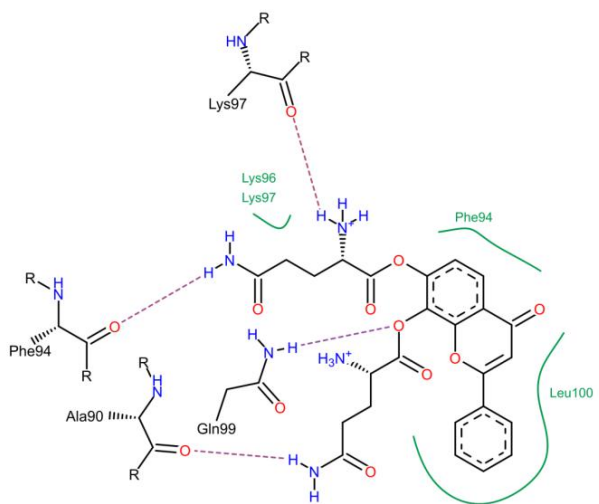



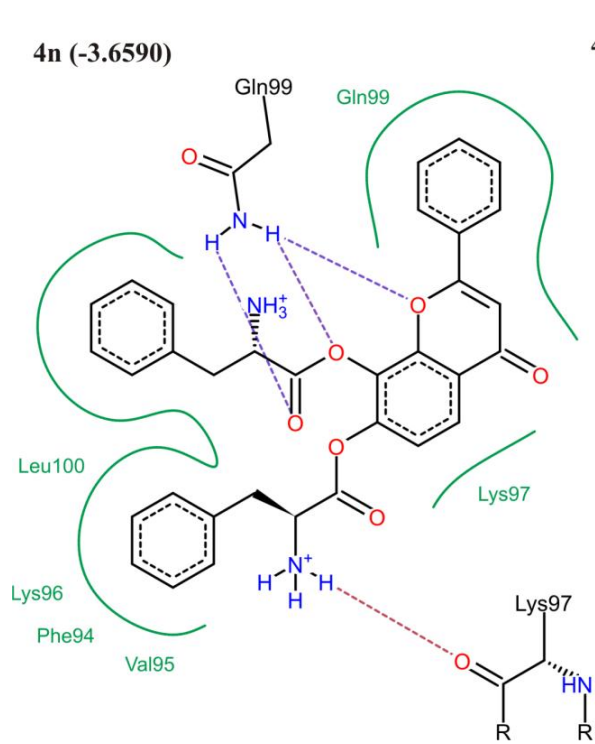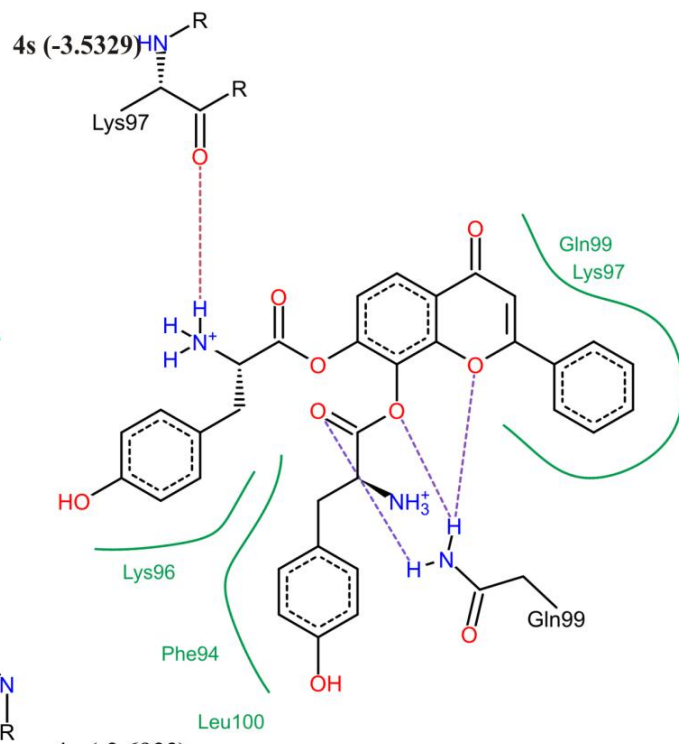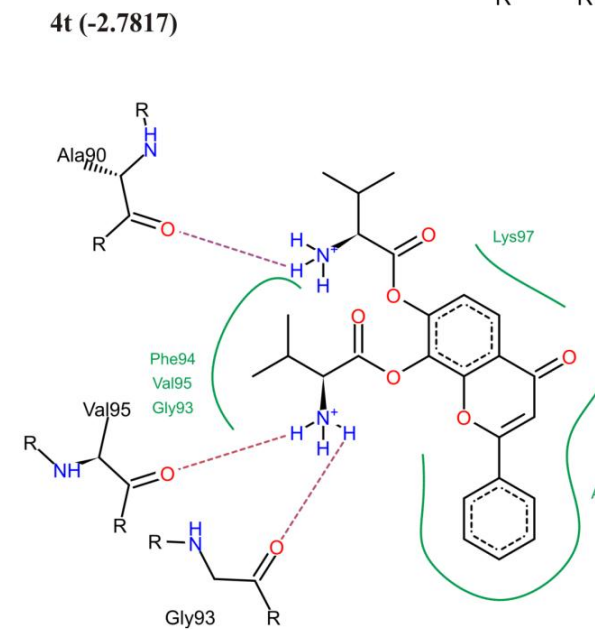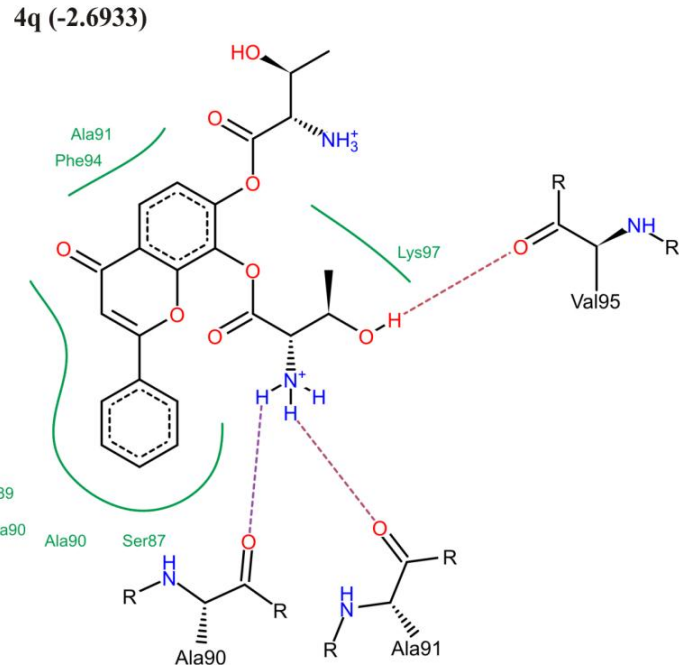

4e (-2.0457)

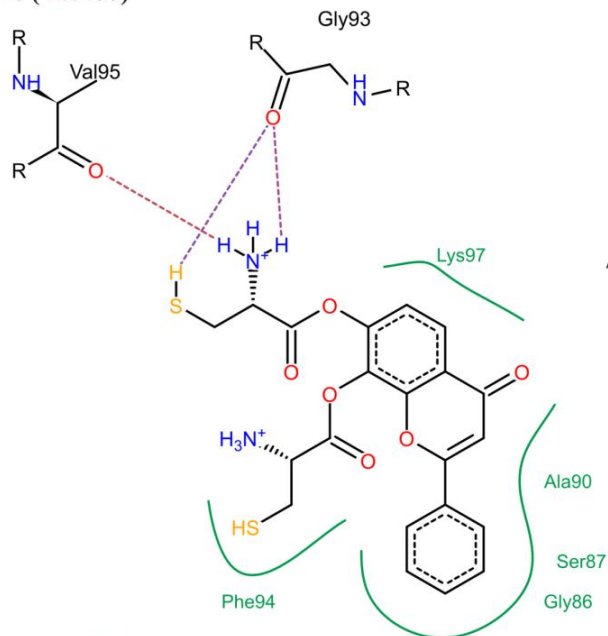

4l (-1.8840)

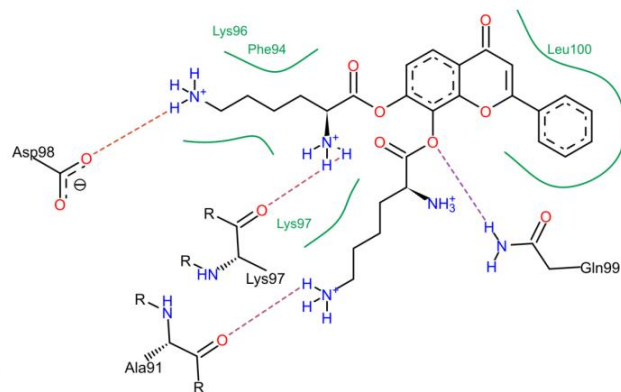

4j (-1.8788)

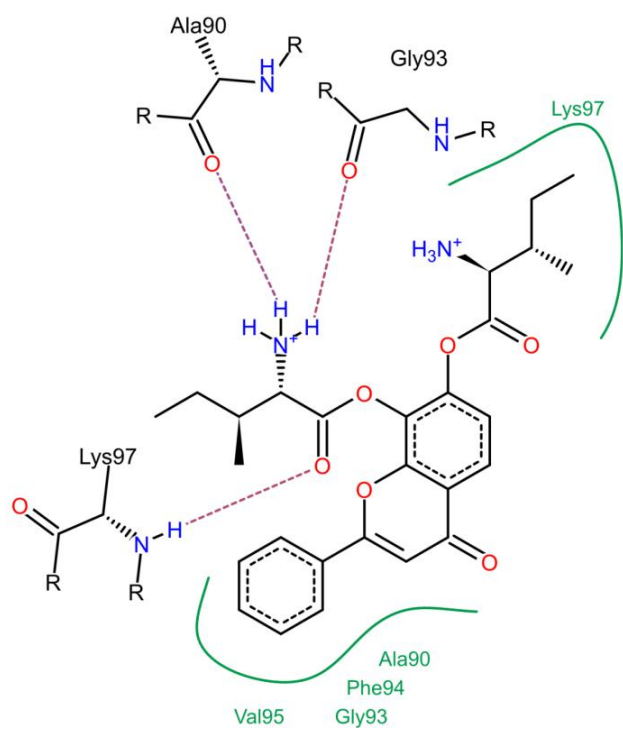

4d (-1.8060)

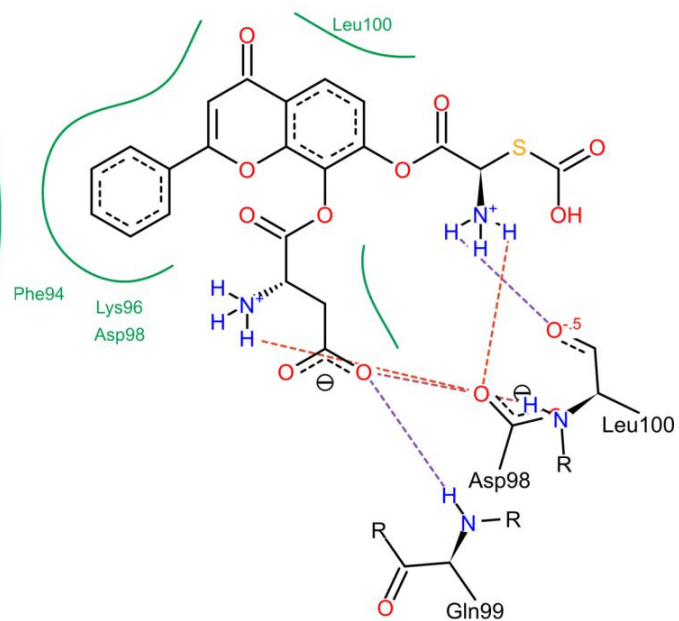

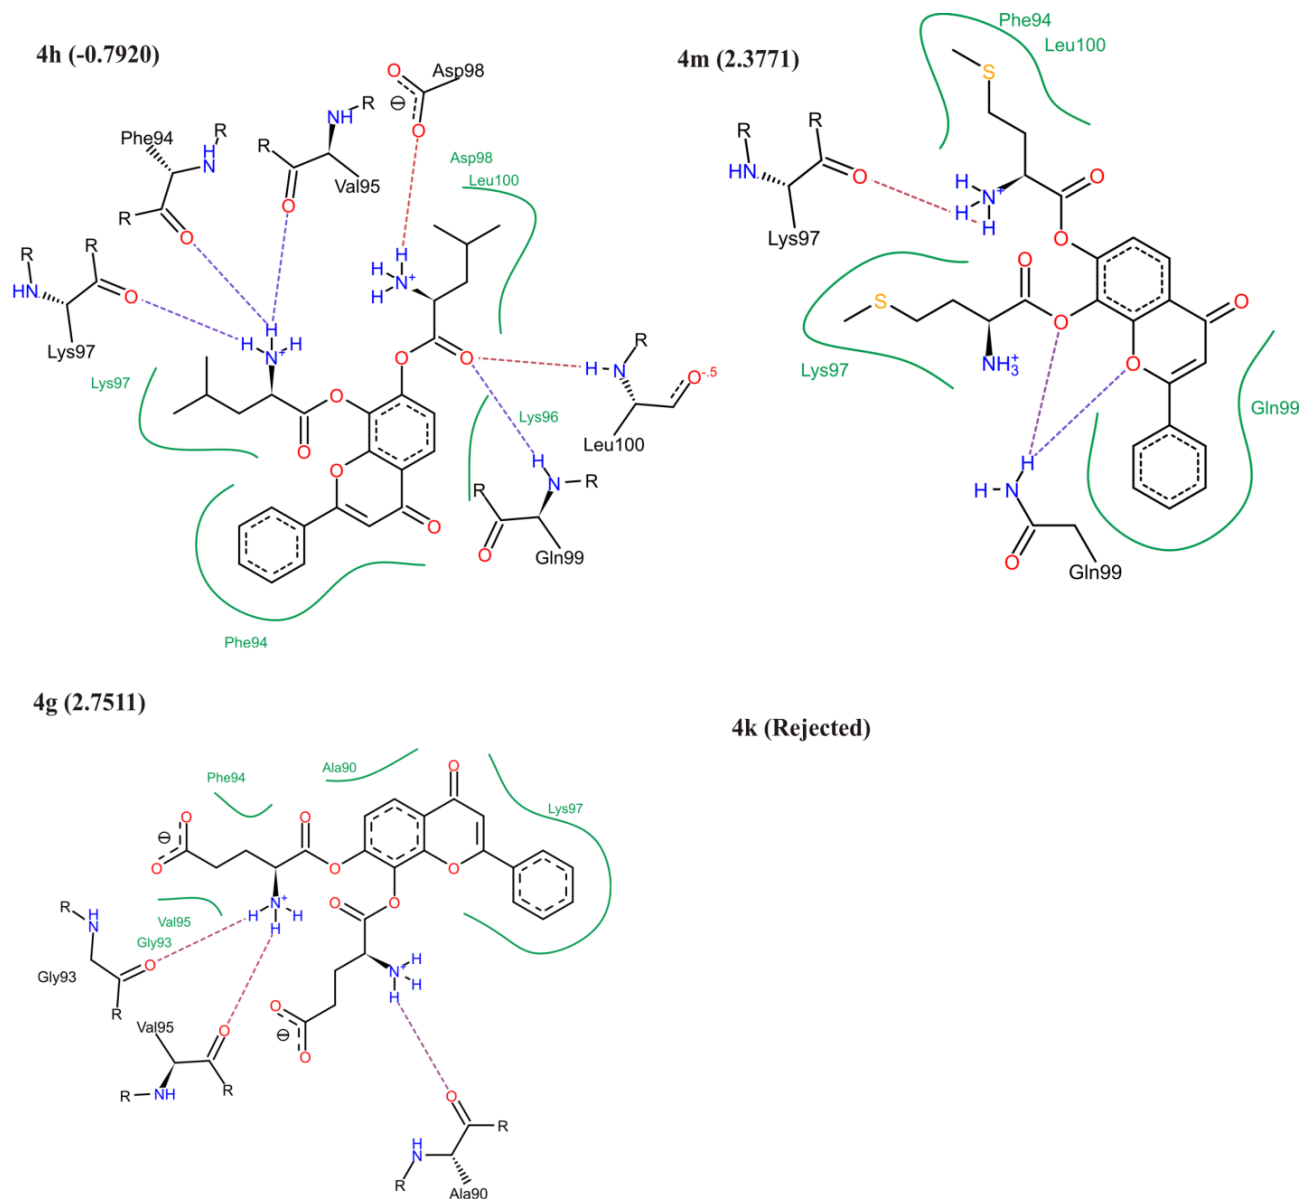

DHF (-14.0383)

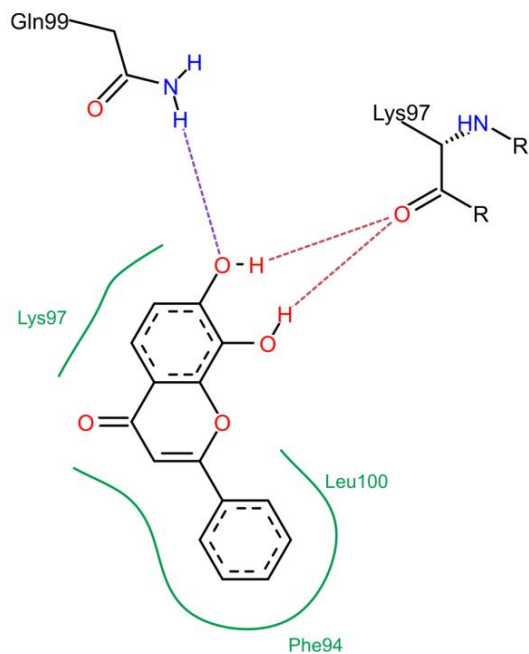

L-DOPA (-9.1560)

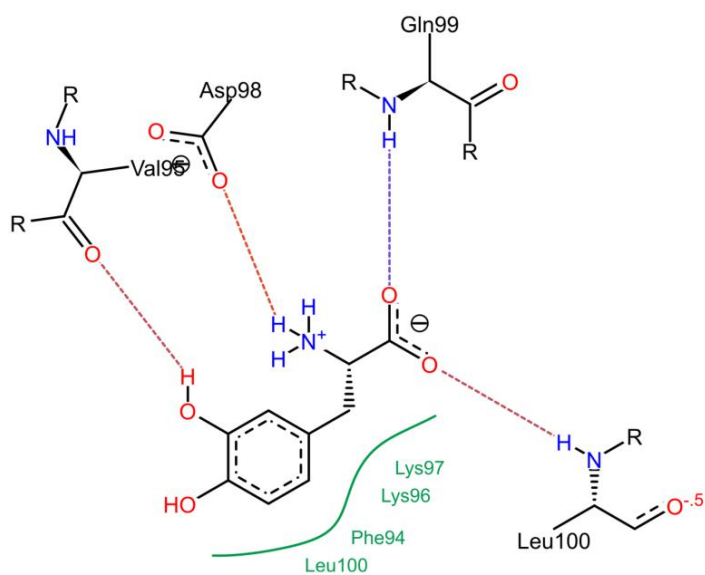

**Supplementary Fig. S1.** The resulted in docked score (kcal/mol) values on DHF derivatives (**8q-4k**), DHF and L-DOPA molecules with ASN. Compounds and score values (in the bracket) are mentioned in the respective figures.

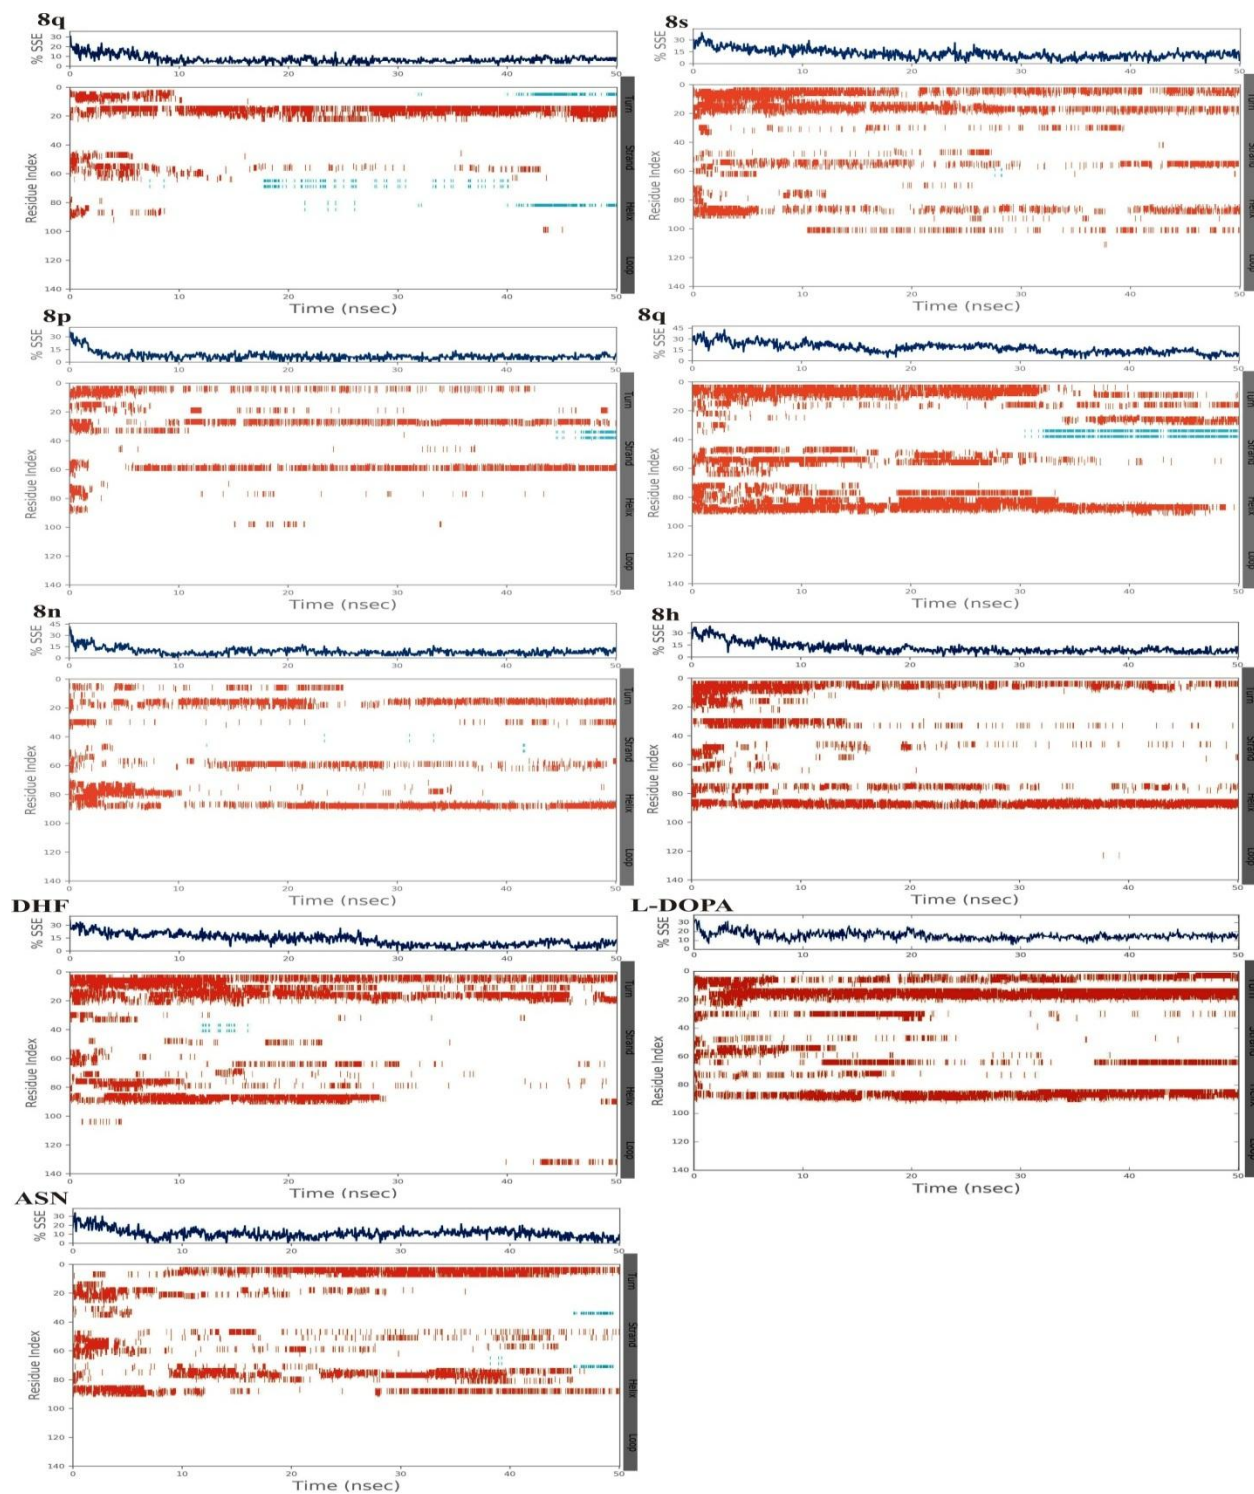

**Supplementary Fig. S2.** Secondary structure elements (SSE) modification of **8q**, **8s**, **8p**, **8c**, **8n**, **8h**, DHF and L-DOPA complexes, and ASN alone throughout MD simulation.

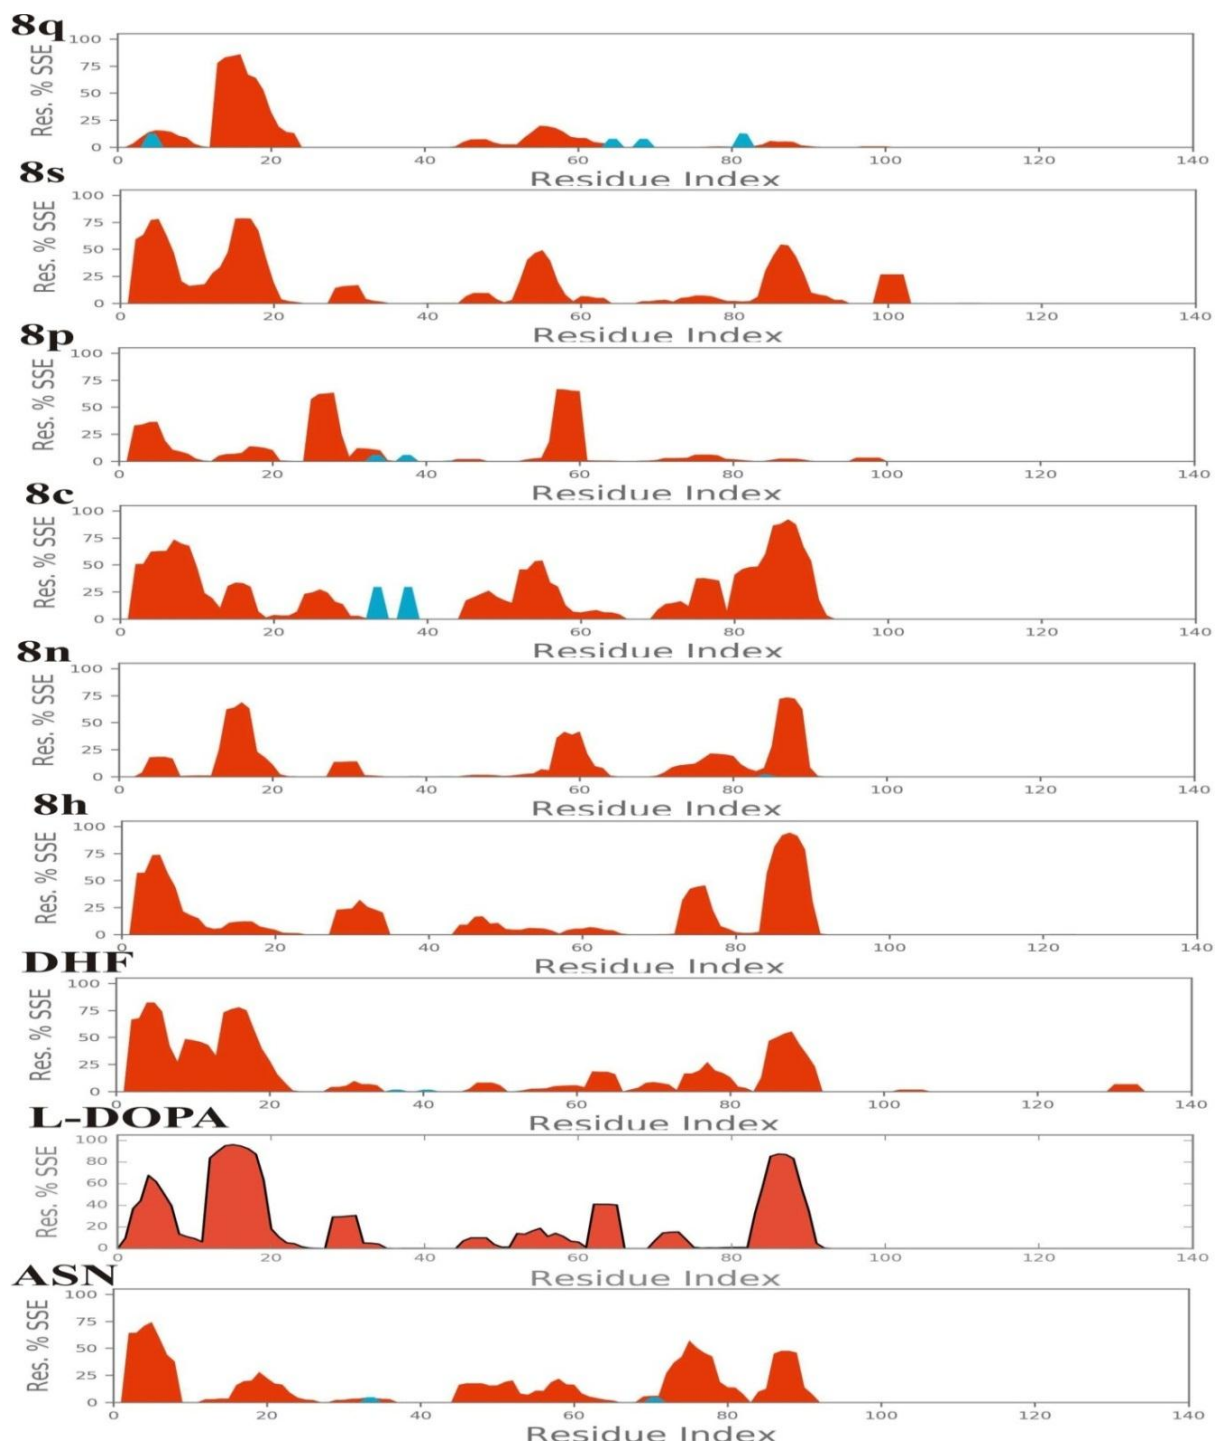

**Supplementary Fig. S3.** Secondary structure elements (SSE) [alpha-helices (Red) and beta-strands (Blue)] plotted for ASN with **8q**, **8s**, **8p**, **8c**, **8n**, **8h**, DHF, L-DOPA and ASN alone.

8q

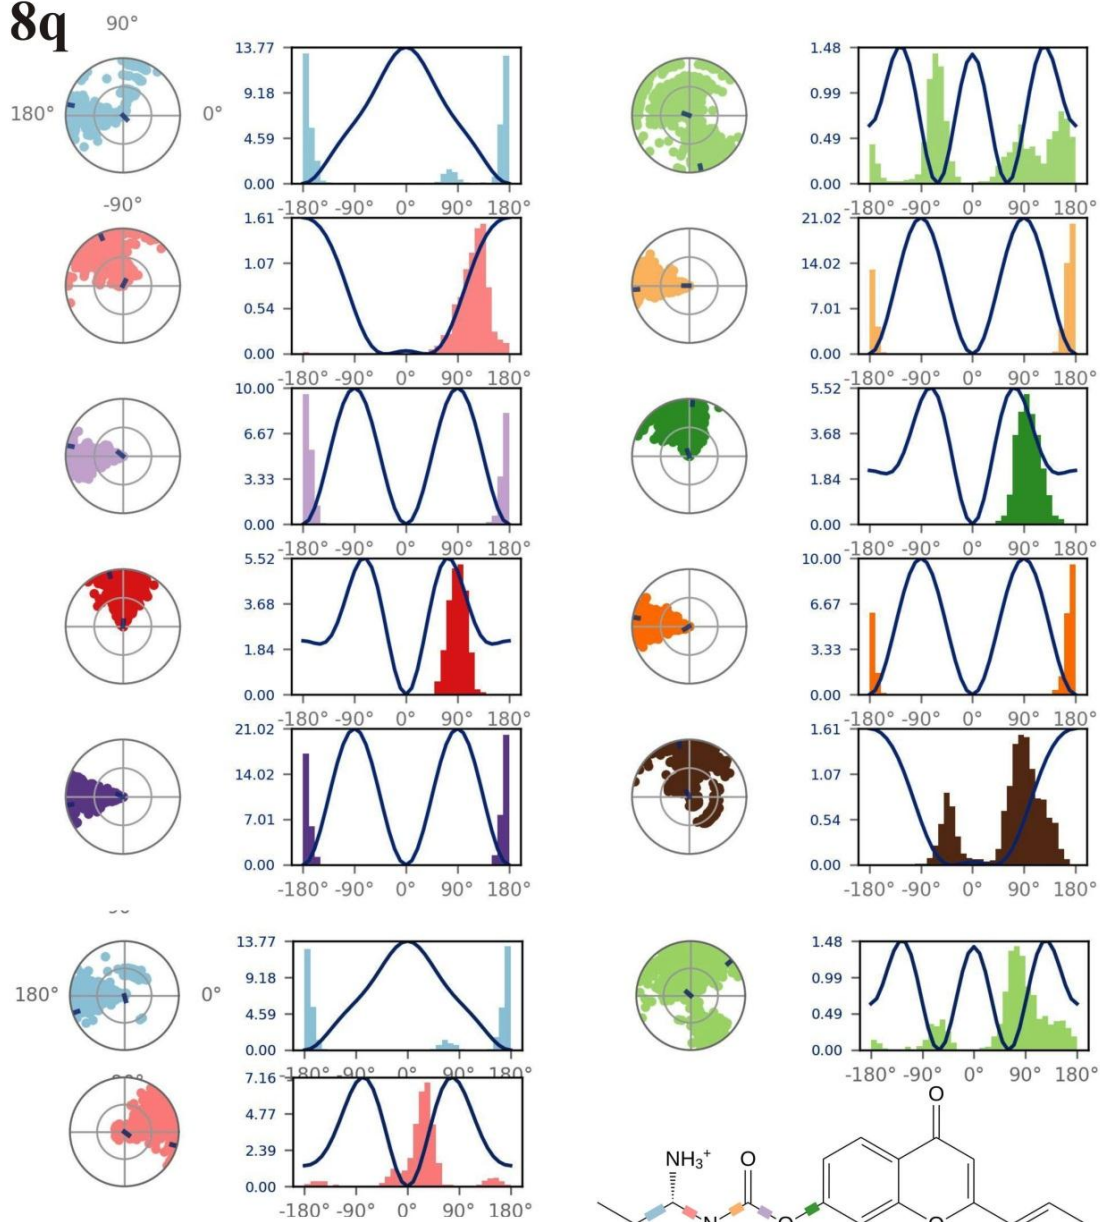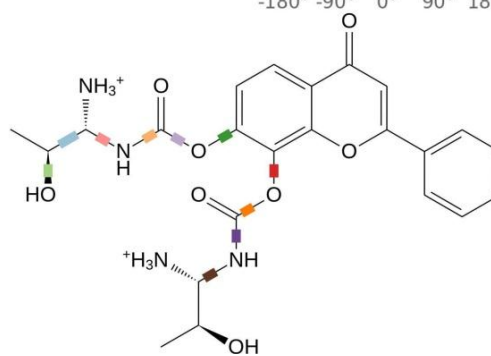

8s

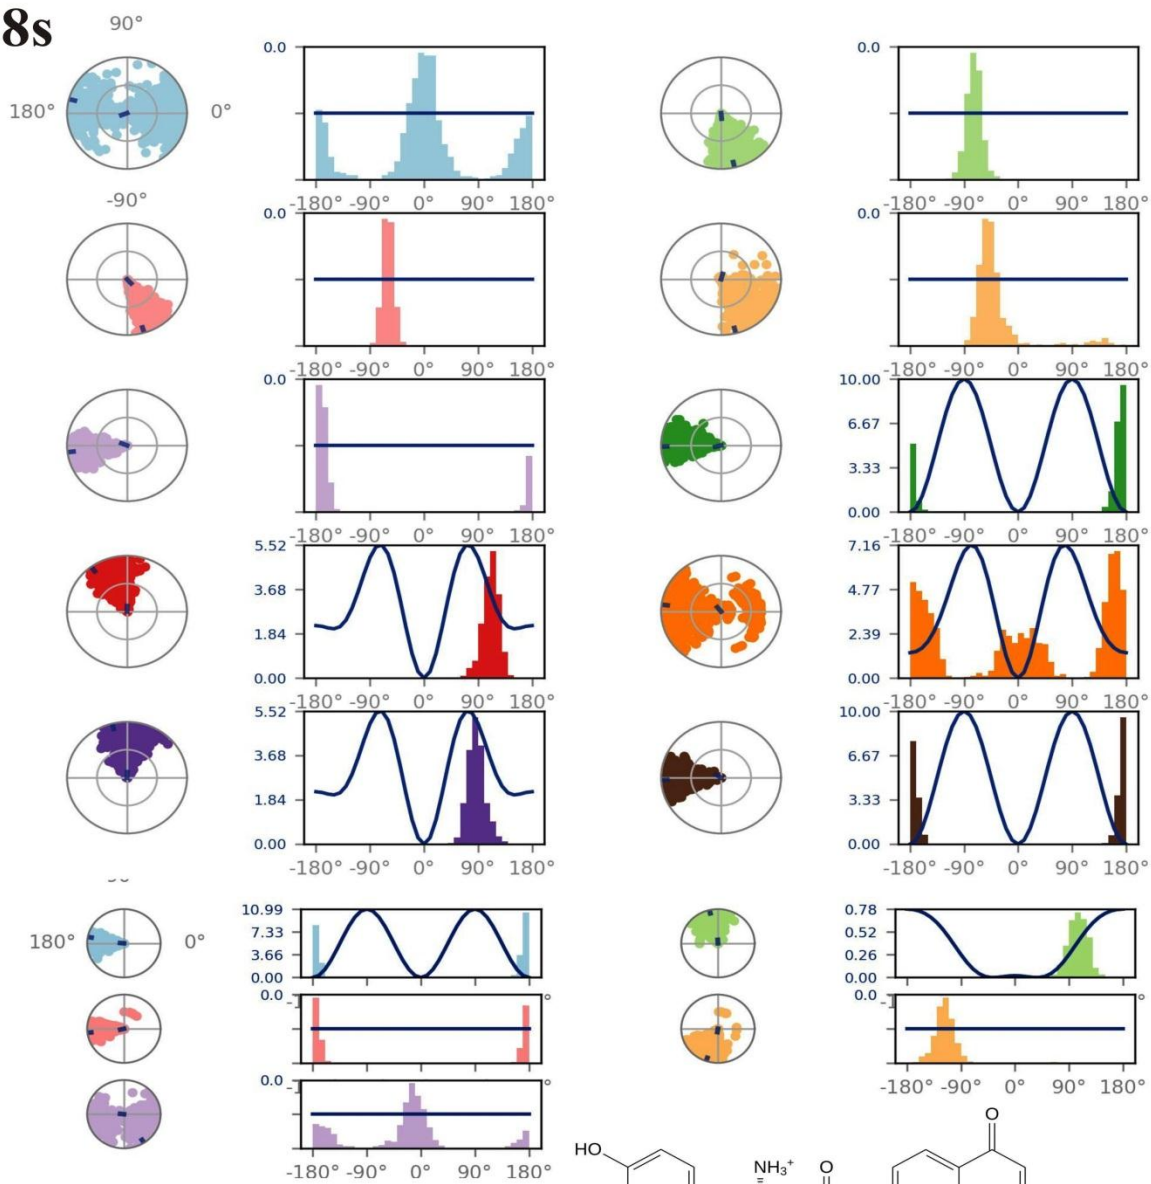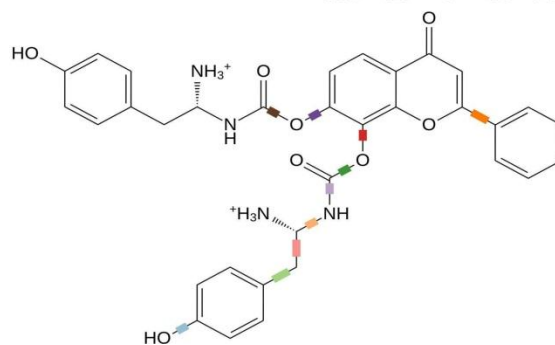



$\delta p$

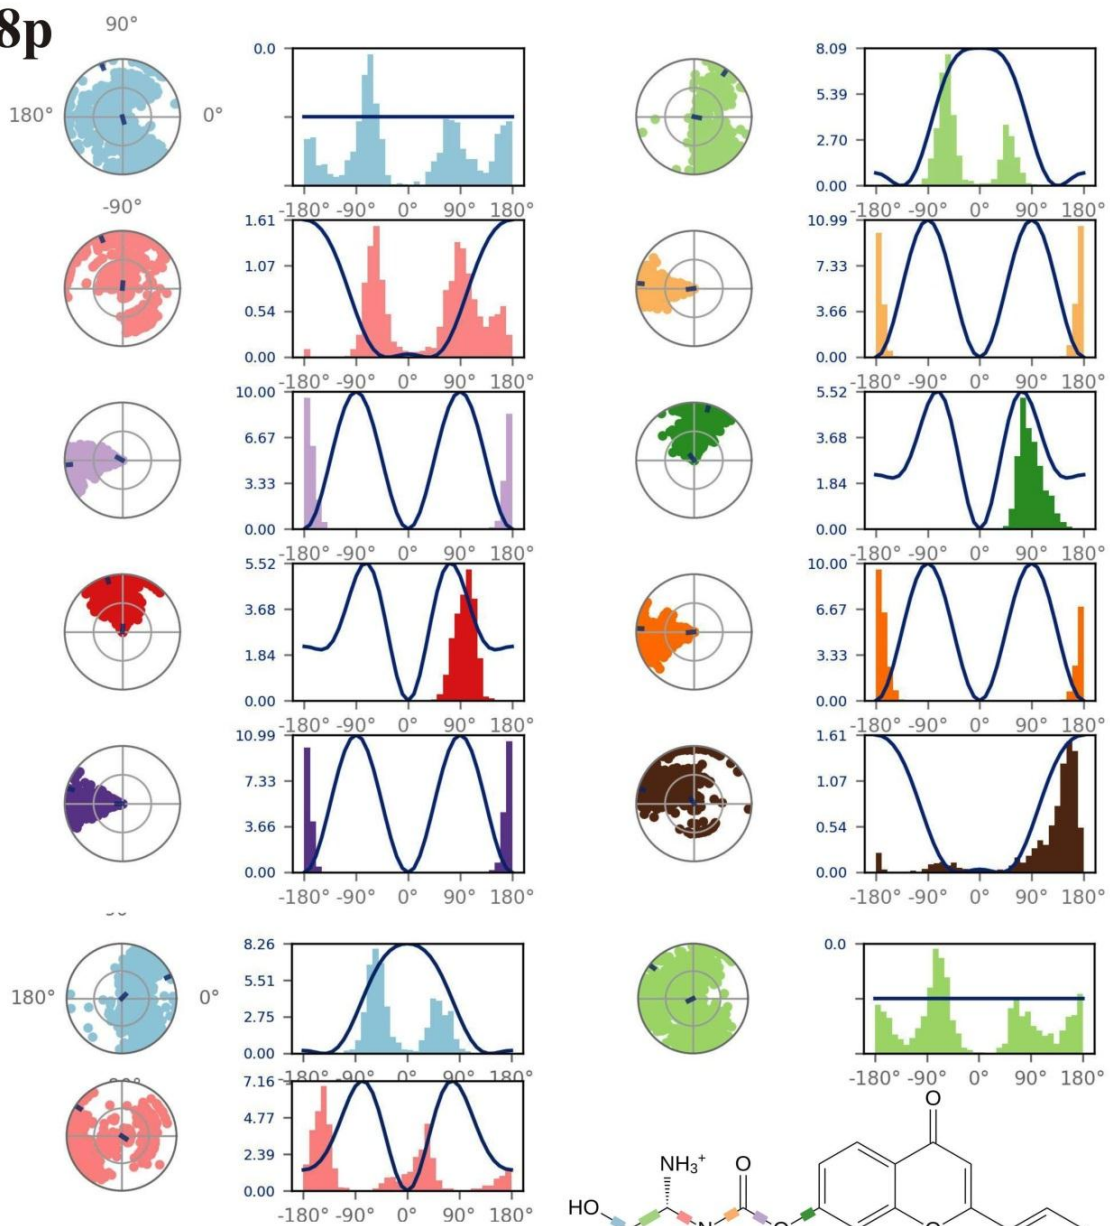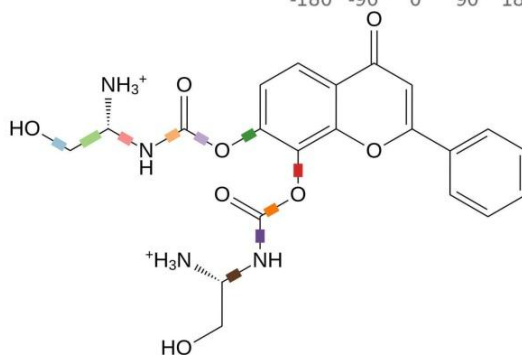

8c

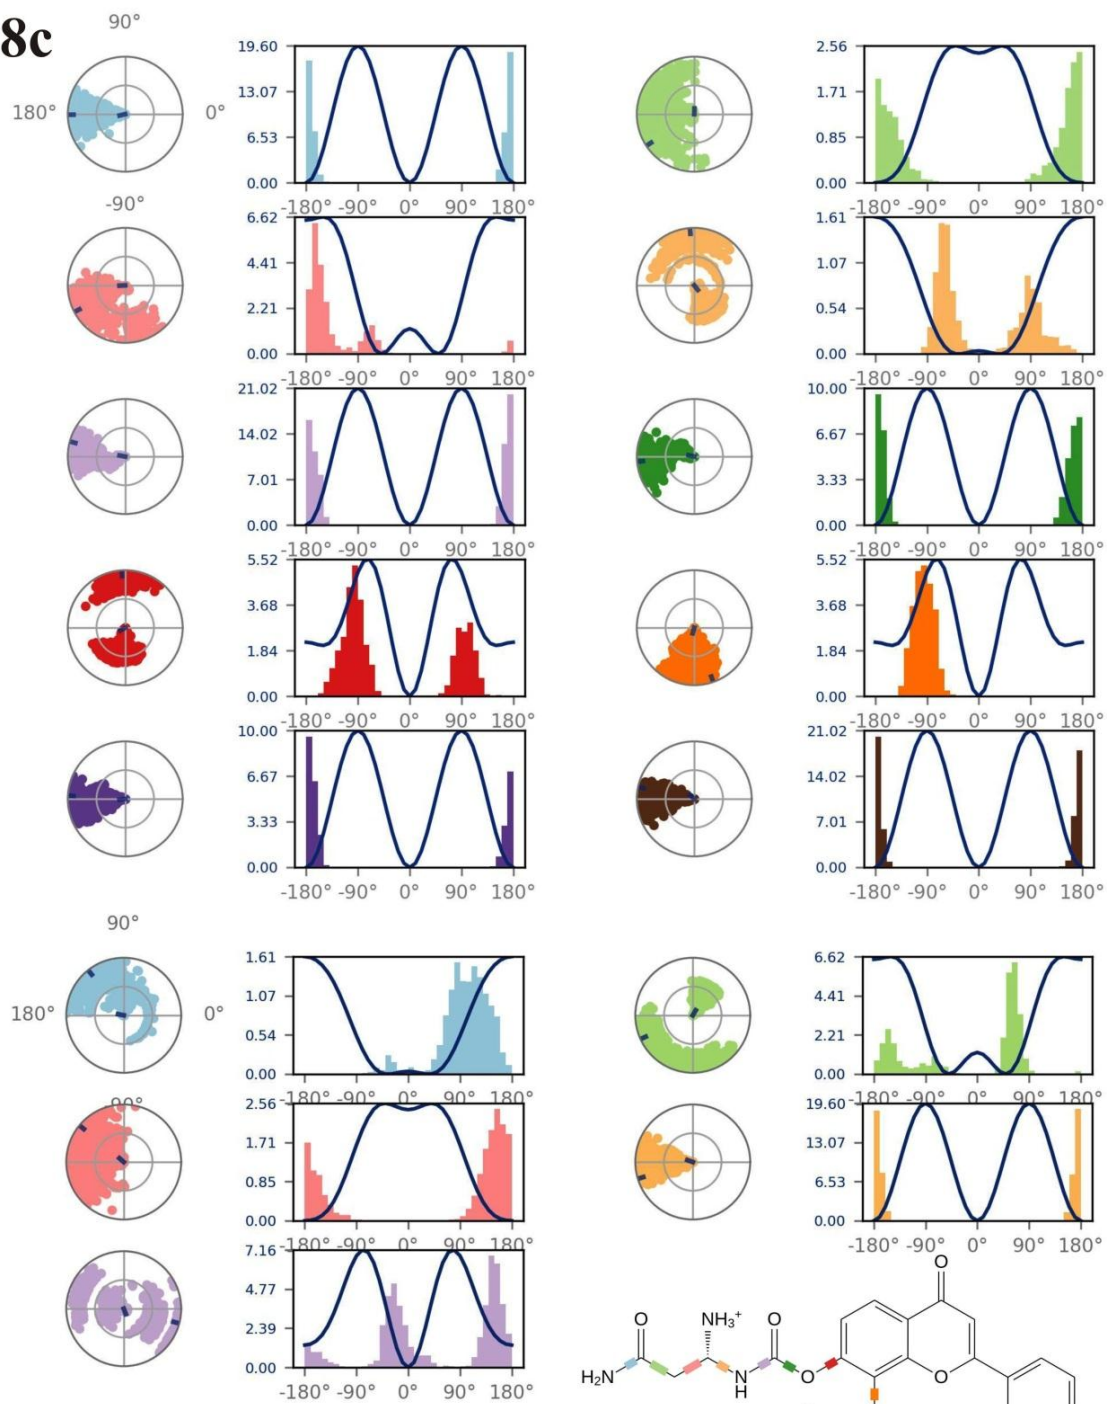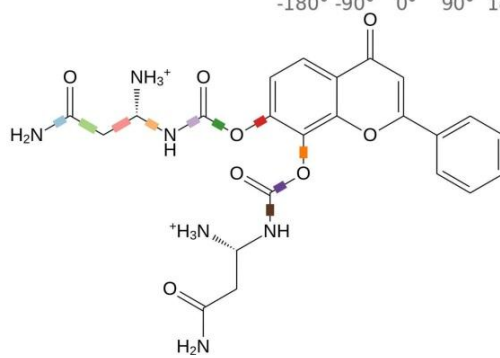

8n

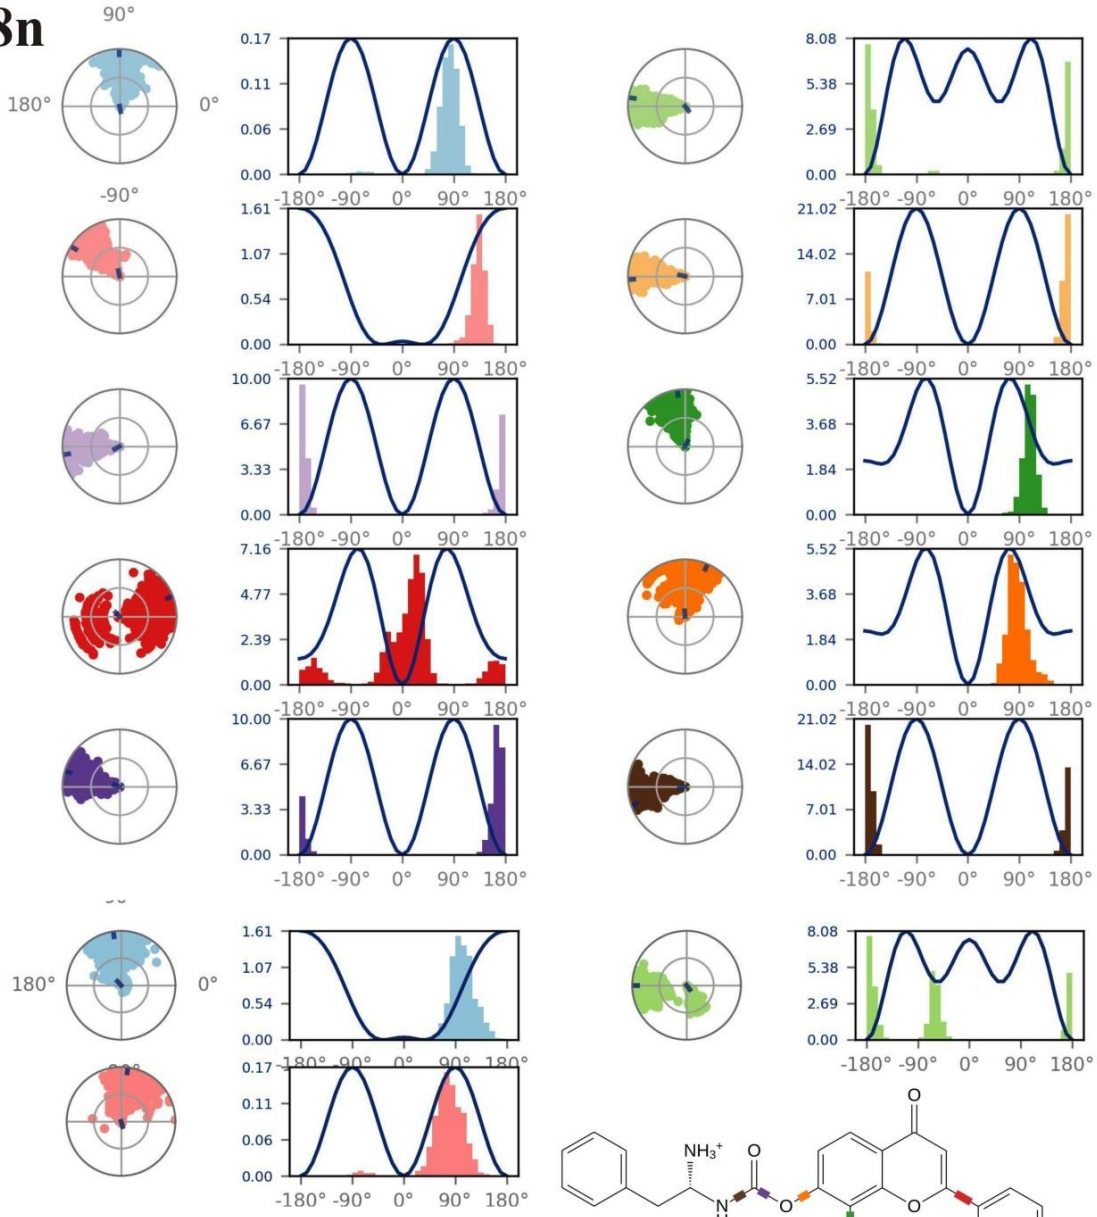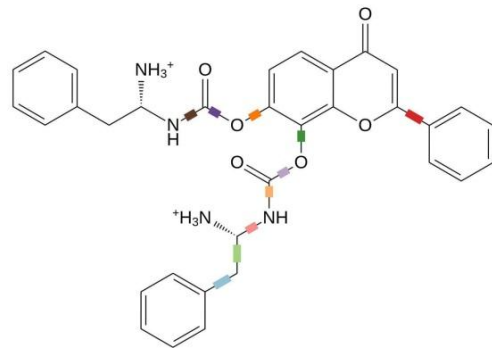

# 8h

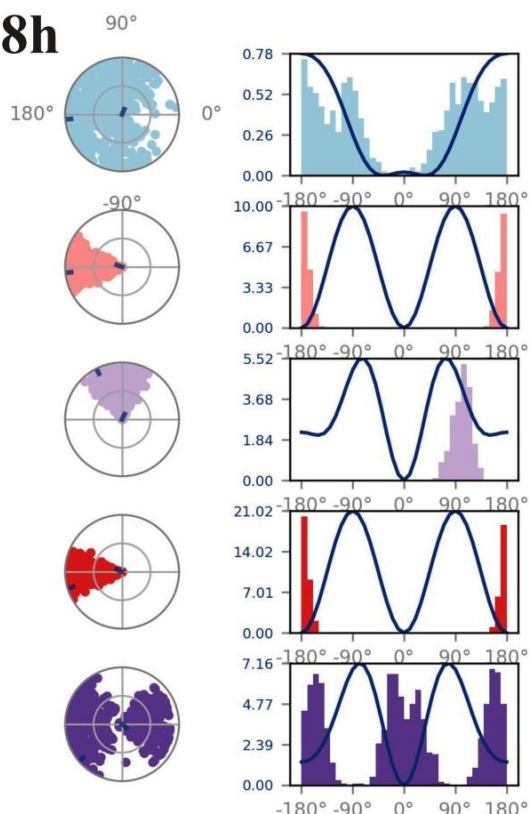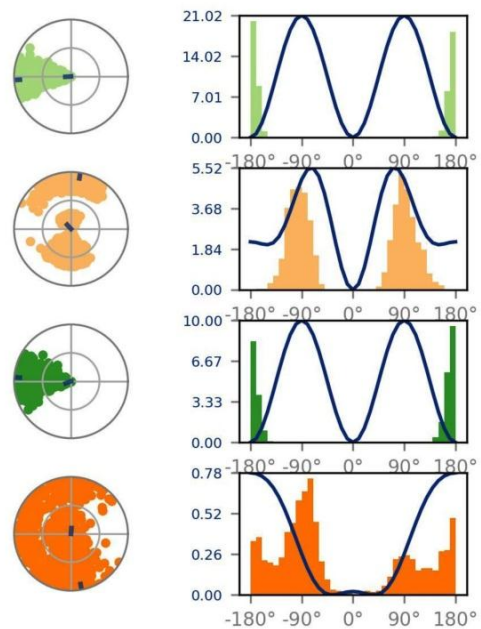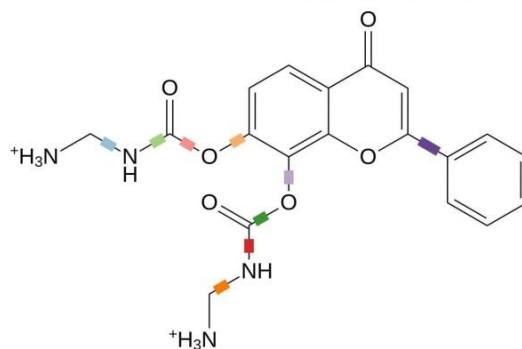

# DHF

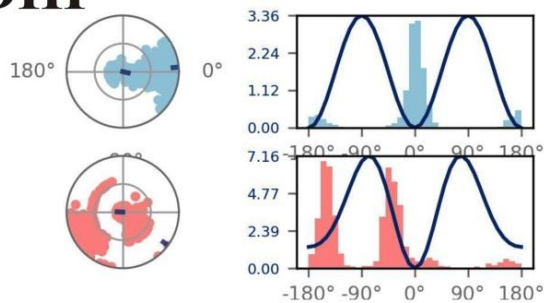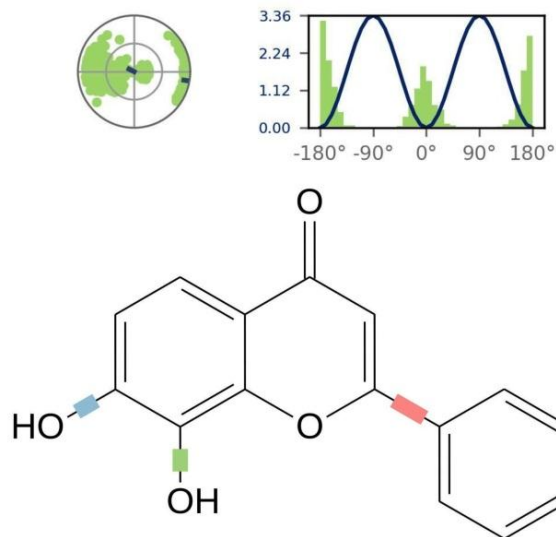

# L-DOPA

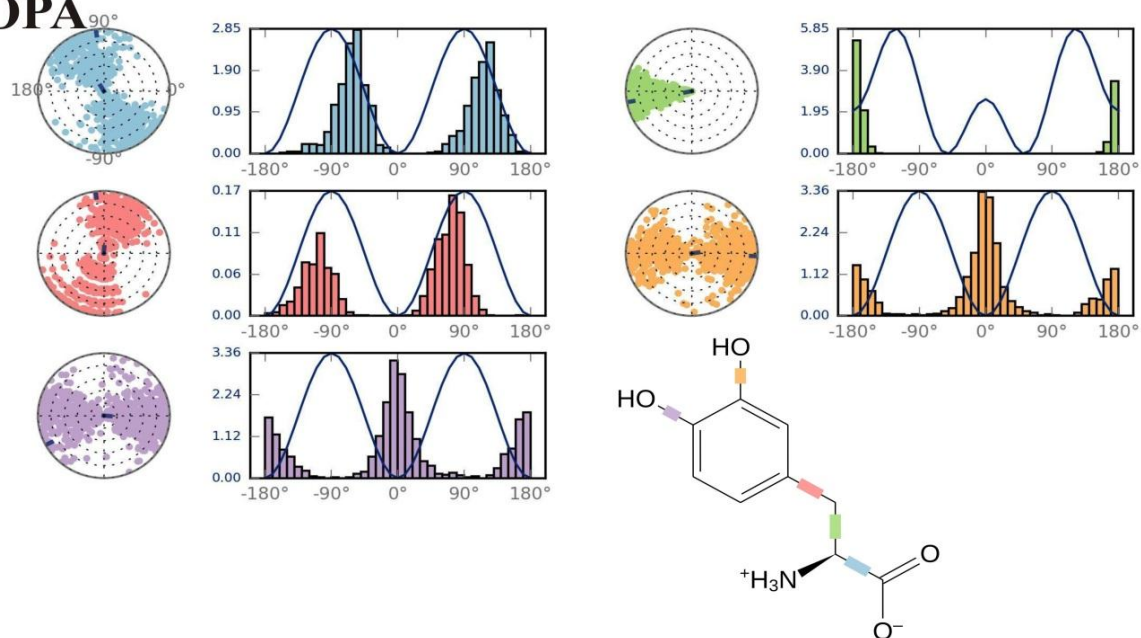

**Supplementary Fig. S4.** The 2-D circle diagram shows torsion angle of **8q**, **8s**, **8p**, **8c**, **8n**, **8h**, DHF and L-DOPA.

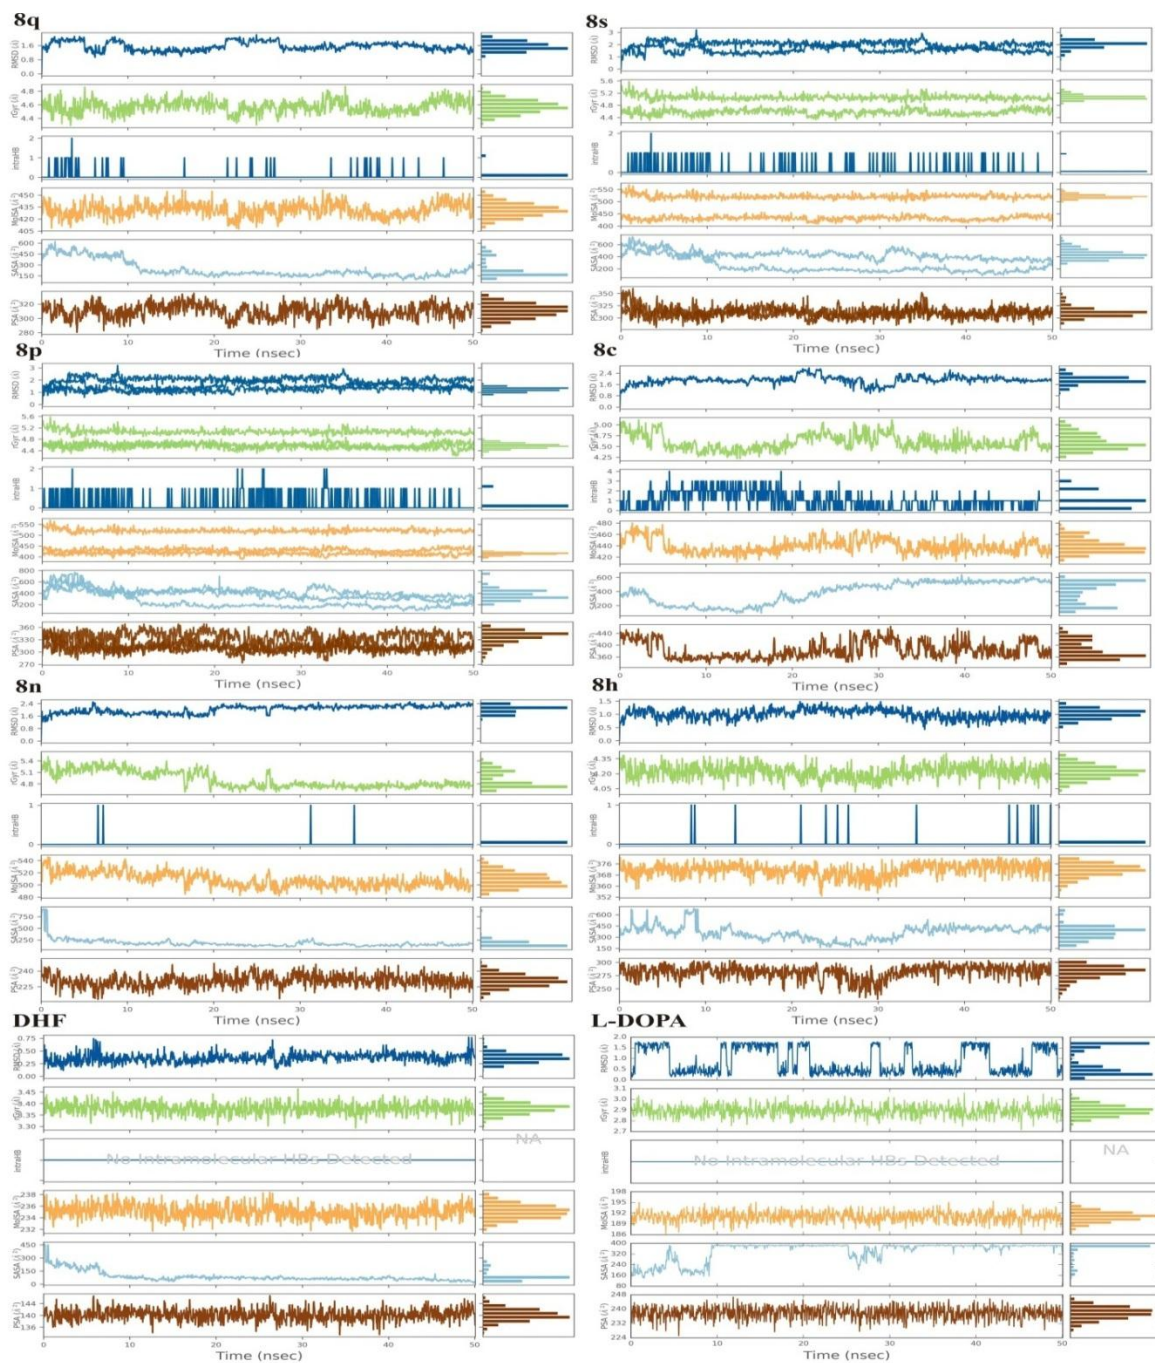

**Supplementary Fig. S5.** Shows the Ligand RMSD, Radius of Gyration (rGyr), Intramolecular Hydrogen Bonds, Molecular Surface Area (MolSA), Solvent Accessible Surface Area (SASA), Polar Surface Area (PSA) of **8q**, **8s**, **8p**, **8c**, **8n**, **8h**, DHF, L-DOPA complexes and ASN alone.

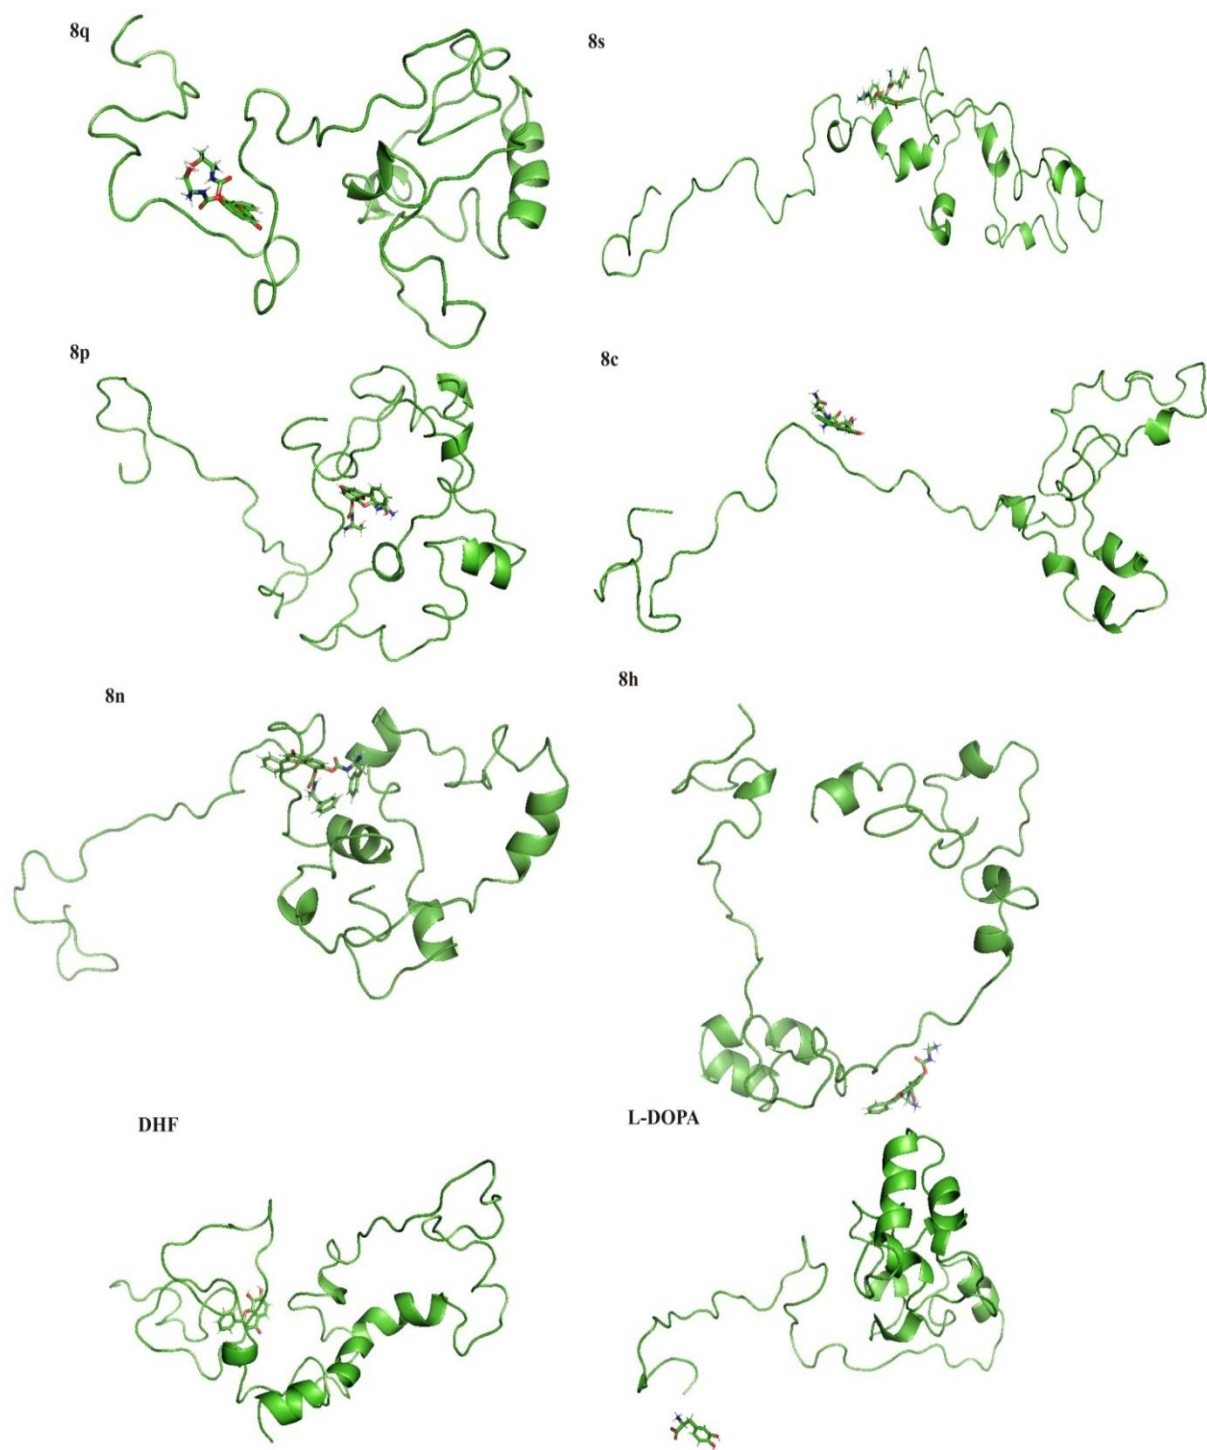

**Supplementary Fig. S6.** 2D Intermolecular interactions of **8q**, **8s**, **8p**, **8c**, **8n**, **8h**, **DHF** and **L-DOPA** ligands with ASN protein.

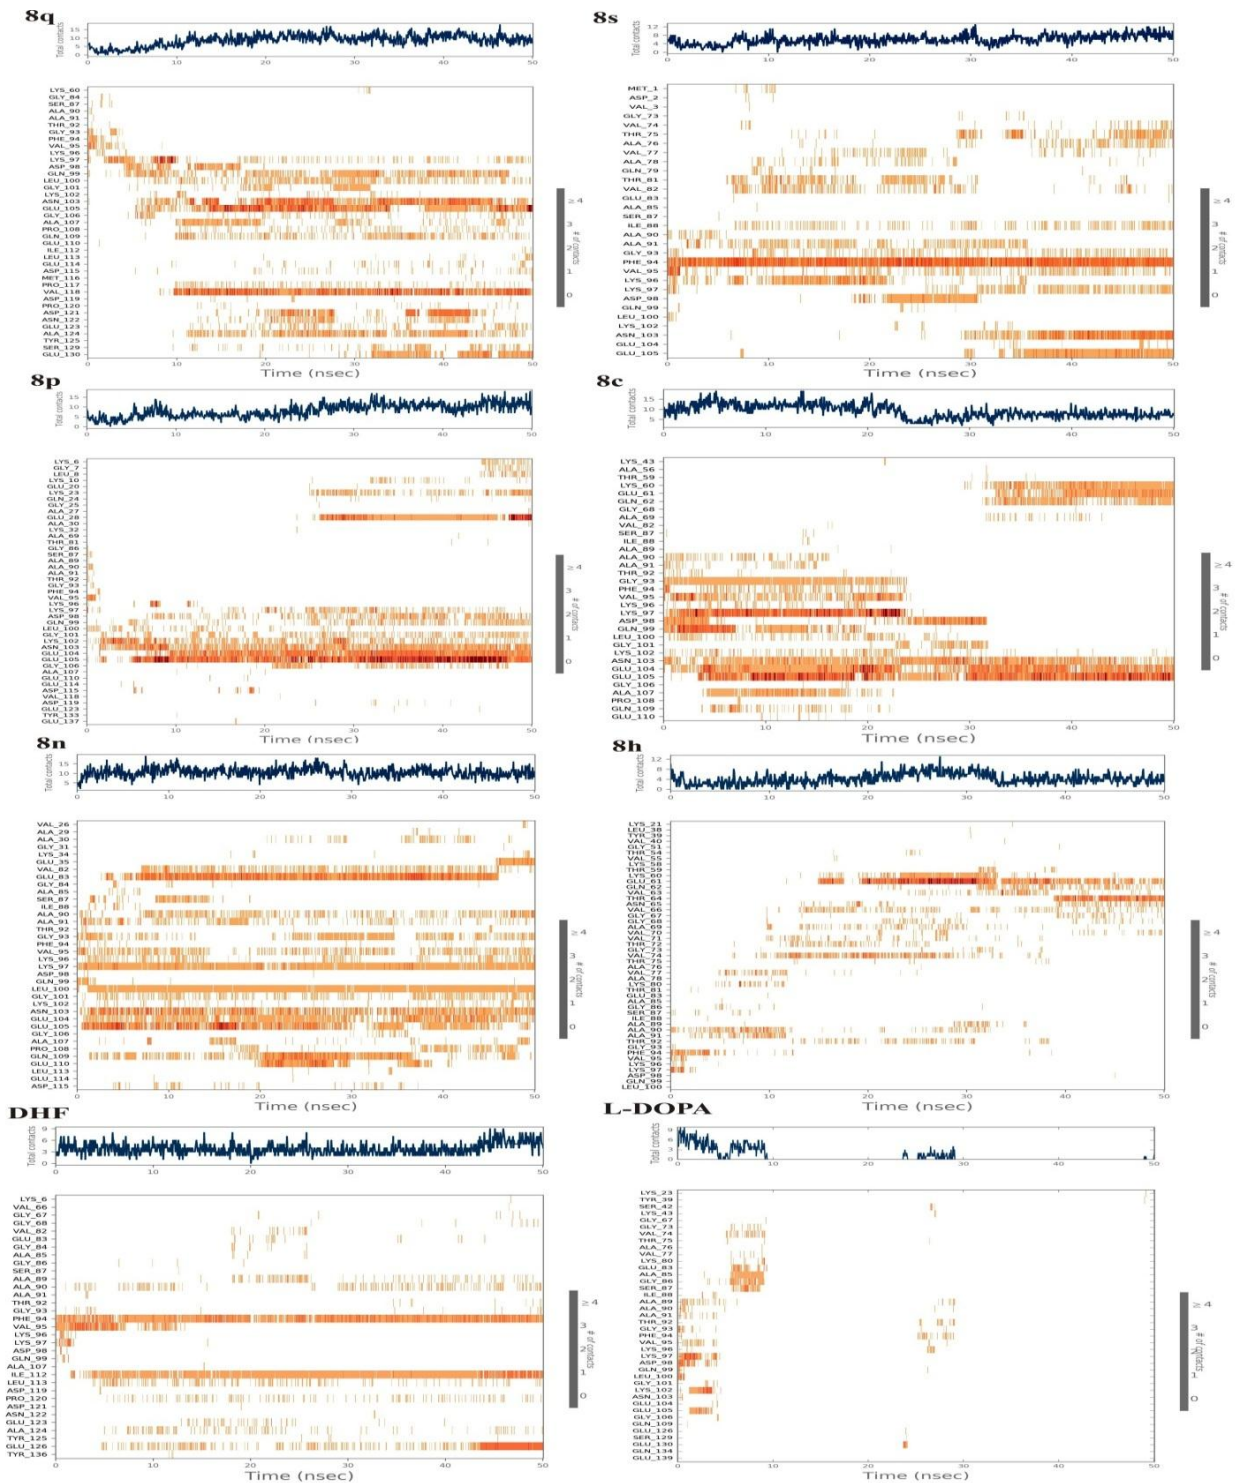

**Supplementary Fig. S7.** The timeline representation of the interactions between ASN with **8q**, **8s**, **8p**, **8c**, **8n**, **8h**, **DHF** and **L-DOPA**.



## Supplementary tables

**Supplementary Table S1.** The DHF derivative molecules derived from scheme 1 and 2, and used as control (C1, C2) molecules.

| Scheme 1 |               |                          |                                                                              |                                                                                              |                                                                                       |
|----------|---------------|--------------------------|------------------------------------------------------------------------------|----------------------------------------------------------------------------------------------|---------------------------------------------------------------------------------------|
| S No     | Compound Name | Molecular Weight (g/mol) | Molecular formula                                                            | IUPAC Name                                                                                   | Chemical structure                                                                    |
| 1        | DHF-BAP       | 396.39                   | C <sub>21</sub> H <sub>20</sub> N <sub>2</sub> O <sub>6</sub>                | 4-oxo-2-phenyl-4 <i>H</i> -chromene-7,8-diyl bis(2-aminopropanoate)                          | 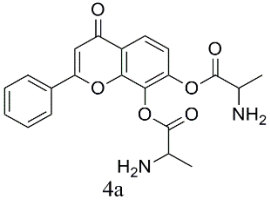   |
| 2        | DHF-BAGP      | 566.61                   | C <sub>27</sub> H <sub>34</sub> N <sub>8</sub> O <sub>6</sub>                | 4-oxo-2-phenyl-4 <i>H</i> -chromene-7,8-diylbis(2-amino-5-guanidinopentanoate)               |   |
| 3        | DHF-BDOB      | 482.44                   | C <sub>23</sub> H <sub>22</sub> N <sub>4</sub> O <sub>8</sub>                | 4-oxo-2-phenyl-4 <i>H</i> -chromene-7,8-diyl bis(2,4-diamino-4-oxobutanoate)                 |  |
| 4        | DHF-BOBAOA    | 484.41                   | C <sub>23</sub> H <sub>20</sub> N <sub>2</sub> O <sub>10</sub>               | 4,4'-((4-oxo-2-phenyl-4 <i>H</i> -chromene-7,8-diyl)bis(oxy))bis(3-amino-4-oxobutanoic acid) |  |
| 5        | DHF-BAMEC     | 490.55                   | C <sub>21</sub> H <sub>22</sub> N <sub>4</sub> O <sub>6</sub> S <sub>2</sub> | 4-oxo-2-phenyl-4 <i>H</i> -chromene-7,8-diylbis(1-amino-2-mercaptoethyl)carbamate)           |  |

|    |             |        |                         |                                                                                                   |                                                                                       |
|----|-------------|--------|-------------------------|---------------------------------------------------------------------------------------------------|---------------------------------------------------------------------------------------|
| 6  | DHF-BDOP    | 510.50 | $C_{25}H_{26}N_4O_8$    | 4-oxo-2-phenyl-4 <i>H</i> -chromene-7,8-diyl bis(2,5-diamino-5-oxopentanoate)                     | 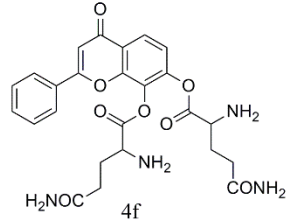   |
| 7  | DHF-BOBAOPA | 512.47 | $C_{25}H_{24}N_2O_{10}$ | 5,5'-((4-oxo-2-phenyl-4 <i>H</i> -chromene-7,8-diyl)bis(oxo))bis(4-amino-5-oxopentanoic acid)     |    |
| 8  | DHF-BAMP    | 480.55 | $C_{27}H_{32}N_2O_6$    | 4-oxo-2-phenyl-4 <i>H</i> -chromene-7,8-diyl bis(2-amino-4-methylpentanoate)                      |    |
| 9  | DHF-BAIP    | 528.52 | $C_{27}H_{24}N_6O_6$    | 4-oxo-2-phenyl-4 <i>H</i> -chromene-7,8-diyl bis(2-amino-3-(1 <i>H</i> -imidazol-4-yl)propanoate) |   |
| 10 | DHF-BAMP    | 480.55 | $C_{27}H_{32}N_2O_6$    | 4-oxo-2-phenyl-4 <i>H</i> -chromene-7,8-diyl bis(2-amino-3-methylpentanoate)                      |  |
| 11 | DHF-BAMP    | 480.55 | $C_{27}H_{32}N_2O_6$    | 4-oxo-2-phenyl-4 <i>H</i> -chromene-7,8-diyl bis(2-amino-4-methylpentanoate)                      |  |

|    |            |        |                         |                                                                                           |                                                                                       |
|----|------------|--------|-------------------------|-------------------------------------------------------------------------------------------|---------------------------------------------------------------------------------------|
| 12 | DHF-BDH    | 510.58 | $C_{27}H_{34}N_4O_6$    | 4-oxo-2-phenyl-4 <i>H</i> -chromene-7,8-diyl bis(2,6-diaminohexanoate)                    | 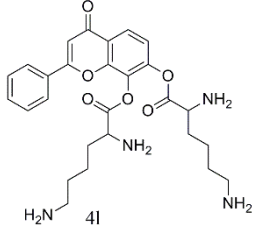   |
| 13 | DHF-BAMTPC | 546.66 | $C_{25}H_{30}N_4O_6S_2$ | 4-oxo-2-phenyl-4 <i>H</i> -chromene-7,8-diyl bis((1-amino-3-(methylthio)propyl)carbamate) |    |
| 14 | DHF-BAAPP  | 548.59 | $C_{33}H_{28}N_2O_6$    | 4-oxo-2-phenyl-4 <i>H</i> -chromene-7,8-diyl bis(2-amino-3-phenylpropanoate)              |    |
| 15 | DHF-BPC    | 448.47 | $C_{25}H_{24}N_2O_6$    | 4-oxo-2-phenyl-4 <i>H</i> -chromene-7,8-diyl bis(pyrrolidine-2-carboxylate)               |  |
| 16 | DHF-BAHP   | 428.39 | $C_{21}H_{20}N_2O_8$    | 4-oxo-2-phenyl-4 <i>H</i> -chromene-7,8-diyl bis(2-amino-3-hydroxypropanoate)             |  |
| 17 | DHF-BAHB   | 456.45 | $C_{23}H_{24}N_2O_8$    | 4-oxo-2-phenyl-4 <i>H</i> -chromene-7,8-diyl bis(2-amino-3-hydroxybutanoate)              |  |

|                 |               |        |                         |                                                                                                          |                                                                                       |
|-----------------|---------------|--------|-------------------------|----------------------------------------------------------------------------------------------------------|---------------------------------------------------------------------------------------|
| 18              | DHF-BAIP      | 626.66 | $C_{37}H_{30}N_4O_6$    | 4-oxo-2-phenyl-4 <i>H</i> -chromene-7,8-diyl bis(2-amino-3-(1 <i>H</i> -indol-3-yl)propanoate)           | 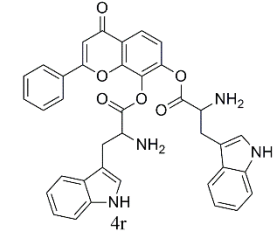   |
| 19              | DHF-BAHPP     | 580.58 | $C_{33}H_{28}N_2O_8$    | 4-oxo-2-phenyl-4 <i>H</i> -chromene-7,8-diyl bis(2-amino-3-(4-hydroxyphenyl)propanoate)                  |    |
| 20              | DHF-BAMB      | 452.50 | $C_{25}H_{28}N_2O_6$    | 4-oxo-2-phenyl-4 <i>H</i> -chromene-7,8-diyl bis(2-amino-3-methylbutanoate)                              |    |
| <b>Scheme 2</b> |               |        |                         |                                                                                                          |                                                                                       |
| 21              | DHF-ACOOPCAAA | 440.45 | $C_{22}H_{24}N_4O_6$    | 7-(((1-aminoethyl) carbamoyl)oxy)-4-oxo-2-phenyl-4 <i>H</i> -chromen-8-yl 2-((1-aminoethyl)amino)acetate |  |
| 22              | DHF-BAGBC     | 596.64 | $C_{27}H_{36}N_{10}O_6$ | 4-oxo-2-phenyl-4 <i>H</i> -chromene-7,8-diyl bis((1-amino-4-guanidinobutyl)carbamate)                    |  |

|    |                |        |                         |                                                                                                                     |                                                                                       |
|----|----------------|--------|-------------------------|---------------------------------------------------------------------------------------------------------------------|---------------------------------------------------------------------------------------|
| 23 | DHF-BDOPC      | 512.47 | $C_{23}H_{24}N_6O_8$    | 4-oxo-2-phenyl-4 <i>H</i> -chromene-7,8-diyl bis((1, 3-diamino-3-oxopropyl)carbamate)                               | 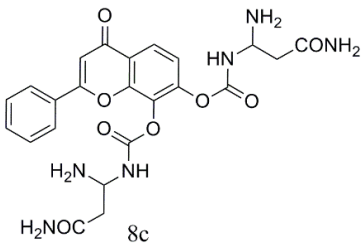   |
| 24 | DHF-BOBCBABAPA | 514.44 | $C_{22}H_{23}N_4O_{10}$ | 3,3'-(((4-oxo-2-phenyl-4 <i>H</i> -chromene-7,8-diylbis(oxy))bis(carbonyl))bis(azanediy))bis(3-aminopropanoic acid) |    |
| 25 | DHF-BAMEC      | 490.55 | $C_{21}H_{22}N_4O_6S_2$ | 4-oxo-2-phenyl-4 <i>H</i> -chromene-7,8-diyl bis((1-amino-2-mercaptoethyl)carbamate)                                |   |
| 26 | DHF-BDOBC      | 540.53 | $C_{25}H_{28}N_6O_8$    | 4-oxo-2-phenyl-4 <i>H</i> -chromene-7,8-diyl bis((1,4-diamino-4-oxobutyl)carbamate)                                 |  |
| 27 | DHF-BOBCBABABA | 542.49 | $C_{25}H_{26}N_4O_{10}$ | 4,4'-(((4-oxo-2-phenyl-4 <i>H</i> -chromene-7,8-diylbis(oxy))bis(carbonyl))bis(azenediy))bis(4-aminobutanoic acid)  |  |
| 28 | DHF-BAMC       | 398.37 | $C_{19}H_{18}N_4O_6$    | 4-oxo-2-phenyl-4 <i>H</i> -chromene-7,8-diyl bis((aminomethyl)carbamate)                                            |  |

|    |                 |        |                         |                                                                                                                             |                                                                                       |
|----|-----------------|--------|-------------------------|-----------------------------------------------------------------------------------------------------------------------------|---------------------------------------------------------------------------------------|
| 29 | DHF-BAIEC       | 558.55 | $C_{27}H_{26}N_8O_6$    | 4-oxo-2-phenyl-4 <i>H</i> -chromene-7,8-diyl bis((1-amino-2-(1 <i>H</i> -imidazol-4-yl)ethyl)carbamate)                     | 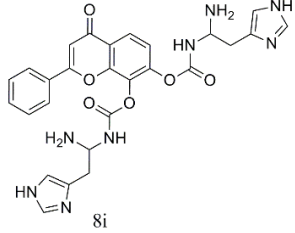   |
| 30 | DHF-BAMBC       | 510.58 | $C_{27}H_{34}N_4O_6$    | 4-oxo-2-phenyl-4 <i>H</i> -chromene-7,8-diyl bis((1-amino-2-methylbutyl)carbamate)                                          |    |
| 31 | DHF-AMCOOPCAMAA | 524.61 | $C_{28}H_{36}N_4O_6$    | 7-(((1-amino-3-methylbutyl)carbamoyl)oxy)-4-oxo-2-phenyl-4 <i>H</i> -chromen-8-yl 2-(((1-amino-3-methylbutyl)amino)acetate) |   |
| 32 | DHF-BDPC        | 540.61 | $C_{27}H_{36}N_6O_6$    | 4-oxo-2-phenyl-4 <i>H</i> -chromene-7,8-diyl bis((1,5-diaminopentyl)carbamate)                                              |  |
| 33 | DHF-BAMTPC      | 546.66 | $C_{25}H_{30}N_4O_6S_2$ | 4-oxo-2-phenyl-4 <i>H</i> -chromene-7,8-diyl bis(2-amino-3-(methylthio)propyl)carbamate                                     |  |

|    |                |        |                         |                                                                                                                              |                                                                                       |
|----|----------------|--------|-------------------------|------------------------------------------------------------------------------------------------------------------------------|---------------------------------------------------------------------------------------|
| 34 | DHF-BAPEC      | 578.61 | $C_{33}H_{30}N_4O_6$    | 4-oxo-2-phenyl-4 <i>H</i> -chromene-7,8-diyl bis((1-amino-2-phenylethyl) carbamate)                                          | 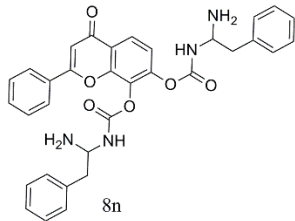   |
| 35 | DHF-BOBCBABPCA | 566.52 | $C_{27}H_{26}N_4O_{10}$ | 1,1'-(((4-oxo-2-phenyl-4 <i>H</i> -chromene-7,8-diyl)bis(oxy))bis(carbonyl))bis(azanediy))bis(pyrrolidine-2-carboxylic acid) |    |
| 36 | DHF-BAHEC      | 458.42 | $C_{21}H_{22}N_4O_8$    | 4-oxo-2-phenyl-4 <i>H</i> -chromene-7,8-diyl bis((1-amino-2-hydroxyethyl) carbamate)                                         |    |
| 37 | DHF-BAHPC      | 486.47 | $C_{23}H_{26}N_4O_8$    | 4-oxo-2-phenyl-4 <i>H</i> -chromene-7,8-diyl bis((1-amino-2-hydroxypropyl) carbamate)                                        |  |
| 38 | DHF-BAIEC      | 656.69 | $C_{37}H_{32}N_6O_6$    | 4-oxo-2-phenyl-4 <i>H</i> -chromene-7,8-diyl bis((1-amino-2-(1 <i>H</i> -indol-3-yl)ethyl) carbamate)                        |  |
| 39 | DHF-BAHPEC     | 610.61 | $C_{33}H_{30}N_4O_8$    | 4-oxo-2-phenyl-4 <i>H</i> -chromene-7,8-diyl bis((1-amino-2-(4-hydroxyphenyl)ethyl) carbamate)                               |  |

|               |               |        |                      |                                                                                                                    |  |
|---------------|---------------|--------|----------------------|--------------------------------------------------------------------------------------------------------------------|--|
| 40            | DHF-AMOPCAMAA | 496.56 | $C_{26}H_{32}N_4O_6$ | 7-(((1-amino-2-methylpropyl)oxy)-4-oxo-2-phenyl-4 <i>H</i> -chromen-8-yl 2-(((1-amino-2-methylpropyl)amino)acetate |  |
| <b>Pubmed</b> |               |        |                      |                                                                                                                    |  |
| C1            | DHF           | 254.23 | $C_{15}H_{10}O_4$    | 7,8-dihydroxy-2-phenyl-4 <i>H</i> -chromen-4-one                                                                   |  |
| C2            | L-DOPA        | 197.18 | $C_9H_{11}NO_4$      | (s)-2-amino-3-(3,4-dihydroxyphenyl)propanoic acid                                                                  |  |



**Supplementary Table S2.** The intermolecular interaction of lead compounds **8q**, **8s**, **8p**, **8c**, **8n**, **8h**, DHF and L-DOPA with active site amino acids of ASN.

| Compound | LeadIT (Docking) |        |            |                  |             |                   |
|----------|------------------|--------|------------|------------------|-------------|-------------------|
|          | LeadIT score     | H-bond | Amino acid | Amino acid atom  | Ligand atom | H-bond Length (Å) |
| 8q       | -16.3120         | 7      | Gln99      | HE22             | O17         | 1.9               |
|          |                  |        | Ala90      | O                | H54         | 2.0               |
|          |                  |        | Gly93      | O                | H55         | 2.3               |
|          |                  |        | Ser87      | O                | H58         | 2.0               |
|          |                  |        | Val95      | O                | H60         | 2.0               |
|          |                  |        | Ala90      | O                | H61         | 2.1               |
|          |                  |        | Gly93      | O                | H62         | 1.8               |
|          |                  |        | Gly93      | O                | H47         | 2.7               |
|          |                  |        | Lys97      | Pi-Cation        |             | 4.7               |
|          |                  |        | Lys96      | Pi-Alkyl         |             | 5.4               |
|          |                  |        | Leu100     |                  |             | 4.9               |
|          |                  |        | Lys97      |                  |             | 4.6               |
|          |                  |        | Lys97      |                  |             | 5.1               |
| 8s       | -16.1875         | 7      | Lys97      | HN               | O25         | 1.9               |
|          |                  |        | Lys96      | HA               | O25         | 3.0               |
|          |                  |        | Leu100     | HN               | O17         | 2.5               |
|          |                  |        | Gln99      | HN               | O17         | 1.9               |
|          |                  |        | Gly93      | O                | H76         | 2.1               |
|          |                  |        | Ser87      | O                | H75         | 1.9               |
|          |                  |        | Val95      | O                | H73         | 1.4               |
|          |                  |        | Val95      | Amide-Pi Stacked |             | 4.8               |
|          |                  |        | Lys96      | Pi-Sigma         |             | 2.1               |
|          |                  |        | Lys97      | Pi-Lone Pair     |             | 2.6               |
|          |                  |        | Ala90      | Pi-Alkyl         |             | 4.5               |
|          |                  |        | Ala91      |                  |             | 4.3               |
|          |                  |        | Leu100     |                  |             | 4.6               |
|          |                  |        | Lys96      |                  |             | 5.2               |
| Lys97    |                  |        | 4.2        |                  |             |                   |
| 8p       | -15.2223         | 8      | Gln99      | HE22             | O17         | 1.9               |
|          |                  |        | Ala90      | O                | H48         | 2.0               |
|          |                  |        | Gly93      | O                | H49         | 2.3               |
|          |                  |        | Ser87      | O                | H52         | 2.0               |
|          |                  |        | Val95      | O                | H54         | 2.0               |
|          |                  |        | Ala90      | O                | H55         | 2.1               |
|          |                  |        | Gly93      | O                | H56         | 1.8               |

|       |          |   |        |                  |     |     |
|-------|----------|---|--------|------------------|-----|-----|
|       |          |   | Gly93  | O                | H46 | 2.7 |
|       |          |   | Lys97  | Pi-Cation        |     | 4.7 |
|       |          |   | Lys96  | Pi-Alkyl         |     | 5.4 |
|       |          |   | Leu100 |                  |     | 4.9 |
|       |          |   | Lys97  |                  |     | 4.6 |
|       |          |   | Lys97  |                  |     | 5.1 |
| 8c    | -14.3118 | 9 | Gln99  | HE22             | O17 | 2.5 |
|       |          |   | Asp98  | OD1              | H55 | 1.4 |
|       |          |   | Val95  | O                | H53 | 1.7 |
|       |          |   | Val95  | O                | H57 | 2.4 |
|       |          |   | Phe94  | O                | H58 | 2.1 |
|       |          |   | Ala90  | O                | H60 | 2.7 |
|       |          |   | Ala91  | O                | H60 | 2.2 |
|       |          |   | Gly93  | O                | H62 | 2.2 |
|       |          |   | Ala90  | HA               | O36 | 3.1 |
|       |          |   | Lys97  | Pi-Cation        |     | 4.2 |
|       |          |   | Lys97  | Pi-Sigma         |     | 2.4 |
|       |          |   | Phe94  | Pi-Pi T-shaped   |     | 5.3 |
|       |          |   | Ala91  | Pi-Alkyl         |     | 5.1 |
|       |          |   | Lys97  |                  |     | 4.4 |
|       |          |   | Leu100 |                  |     | 4.9 |
| 8n    | -14.2893 | 5 | Lys97  | HN               | O25 | 1.9 |
|       |          |   | Gln99  | HN               | O17 | 1.9 |
|       |          |   | Leu100 | HN               | O17 | 2.5 |
|       |          |   | Val95  | O                | H73 | 1.5 |
|       |          |   | Gly93  | O                | H74 | 2.0 |
|       |          |   | Lys96  | Pi-Sigma         |     | 2.2 |
|       |          |   | Lys97  | Pi-Lone pair     |     | 2.5 |
|       |          |   | Val95  | Amide-Pi Stacked |     | 4.7 |
|       |          |   | Leu100 | Pi-Alkyl         |     | 4.6 |
|       |          |   | Lys97  |                  |     | 4.2 |
|       |          |   | Ala90  |                  |     | 4.3 |
| Ala91 | 4.5      |   |        |                  |     |     |
| 8h    | -14.2810 | 6 | Ser87  | O                | H44 | 2.0 |
|       |          |   | Gln99  | HE22             | O17 | 1.9 |
|       |          |   | Ala90  | O                | H42 | 2.0 |
|       |          |   | Ala90  | O                | H43 | 2.3 |
|       |          |   | Val95  | O                | H46 | 2.3 |
|       |          |   | Gly93  | O                | H47 | 1.5 |
|       |          |   | Lys97  | Pi-Cation        |     | 4.3 |
|       |          |   | Leu100 | Pi-Alkyl         |     | 4.2 |
|       |          |   | Lys97  |                  |     | 4.5 |
| DHF   | -14.0383 | 3 | Gln99  | HE22             | O17 | 2.1 |
|       |          |   | Lys97  | O                | H28 | 1.9 |
|       |          |   | Lys97  | O                | H29 | 2.0 |

|        |         |   |        |                   |     |     |
|--------|---------|---|--------|-------------------|-----|-----|
|        |         |   | Phe94  | Pi-Pi Stacked     |     | 3.8 |
|        |         |   | Leu100 | Pi-Alkyl          |     | 4.4 |
| L-DOPA | -9.1560 | 5 | Asp98  | OD1               | H24 | 1.6 |
|        |         |   | Phe94  | HA                | O1  | 3.1 |
|        |         |   | Gln99  | HN                | O4  | 2.3 |
|        |         |   | Leu100 | HN                | O4  | 2.2 |
|        |         |   | Val95  | O                 | H21 | 1.7 |
|        |         |   | Phe94  | Pi-Sigma          |     | 2.2 |
|        |         |   | Lys97  | Attractive Charge |     | 5.3 |
|        |         |   | Lys97  | Pi-Alkyl          |     | 5.3 |
|        |         |   | Leu100 |                   |     | 5.3 |

**Supplementary Table S3.** The ADMET properties and AMES mutagenicity studies for lead compounds **8q**, **8s**, **8p**, **8c**, **8n**, **8h** DHF and L-DOPA.

| Compound                                              | 8q        | 8s       | 8p       | 8c        | 8n       | 8h        | DHF      | L-DOPA   |
|-------------------------------------------------------|-----------|----------|----------|-----------|----------|-----------|----------|----------|
| Molecular weight                                      | 486.47    | 610.61   | 458.42   | 512.47    | 578.61   | 398.37    | 254.23   | 197.18   |
| H-bond donor                                          | 6         | 6        | 6        | 6         | 4        | 4         | 2        | 3        |
| H-bond acceptor                                       | 8         | 8        | 8        | 8         | 6        | 6         | 4        | 4        |
| log P                                                 | -0.929    | 2.203    | -1.684   | -2.401    | 2.687    | -1.04     | 2.652    | -2.089   |
| AQ SOL LEV                                            | 3         | 2        | 3        | 2         | 2        | 3         | 3        | 5        |
| BBB LEV                                               | 4         | 4        | 4        | 4         | 4        | 4         | 2        | 4        |
| CYP 2D6                                               | -7.87546  | -4.97894 | -7.87546 | -9.93245  | -6.27104 | -8.15065  | -5.77583 | -6.85987 |
| HEPATOX                                               | -0.436636 | -2.55554 | -1.2086  | -0.111251 | -3.39089 | -0.945906 | -1.28197 | -4.01274 |
| PPB LEV                                               | -5.30747  | -7.08034 | -6.1351  | -8.50688  | -1.34427 | -3.32076  | 2.10687  | -11.929  |
| NTP Carcinogenicity Call (Male Mouse) (v3.2)-TOPKAT   | 1.000     | 1.000    | 1.000    | 1.000     | 1.000    | 1.000     | 1.000    | 0.000    |
| NTP Carcinogenicity Call (Female Mouse) (v3.2)-TOPKAT | 0.000     | 0.082    | 0.000    | 0.000     | 0.002    | 0.000     | 0.000    | 0.000    |
| Developmental Toxicity Potential (DTP) (v3.1)-TOPKAT  | 1.000     | 1.000    | 1.000    | 1.000     | 1.000    | 1.000     | 0.999    | 0.293    |
| Skin Irritation (v6.1)-TOPKAT                         | 0.000     | 0.000    | 0.247    | 1.000     | 0.000    | 0.000     | 0.000    | 0.303    |
| Ames Mutagenicity (v3.1)-TOPKAT                       | 0.000     | 0.000    | 0.000    | 0.000     | 0.000    | 1.000     | 0.000    | 0.000    |

**Solubility:** 0-2 highly soluble, **BBB:** 2- medium penetration and 3- low penetration, **CYP2D6:** -ve – non-inhibitors & +ve –inhibition.

**HEPATOX:** 0-1: Non-toxic, **PPB:** Greater the value greater the binding capacity and toxicity analysis using TOPKAT.

**Note:** **0-** Negative result, **1:** positive results
